# Supplementary material for: Expression of the Z Variant of α1-Antitrypsin Suppresses Hepatic Cholesterol Biosynthesis in Transgenic Zebrafish
Source: MDPI journal article supplement (doi:10.3390/ijms24032475), 2023-01-27
Supplement: s1 [file s1]

## Supplementary Figures

Unprocessed gel images/data files are available at <https://figshare.com/s/a7fe6149482d21aabf3a>

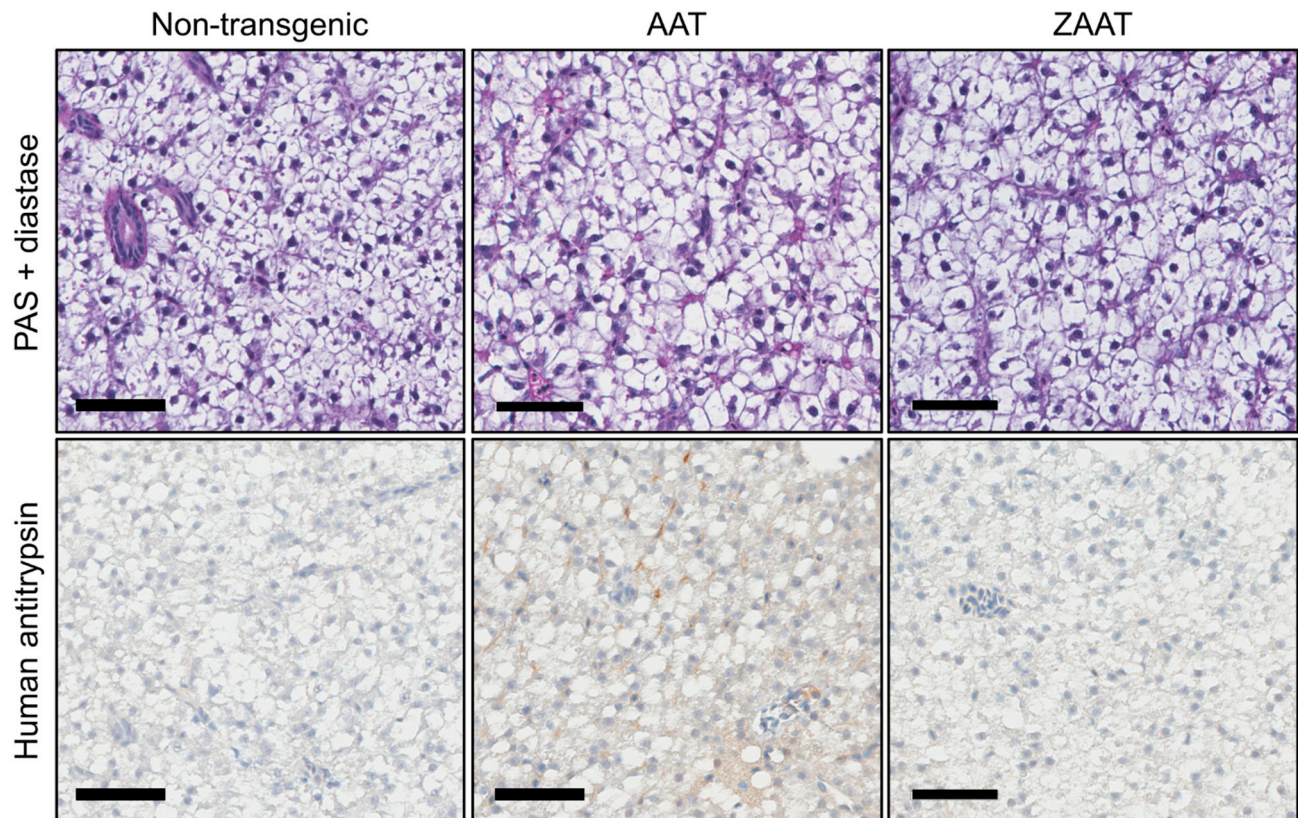

**Figure S1. Absence of ZAAT-containing inclusions in transgenic zebrafish liver.**

Periodic acid-Schiff (PAS) staining with diastase (top panels) and immunohistochemical staining using a polyclonal guinea pig antibody against human  $\alpha$ 1-antitrypsin (bottom panel) was performed on 3  $\mu$ m thick paraffin liver sections from non-transgenic (left panels), AAT-transgenic (middle panels) and ZAAT-transgenic (right panels) adult zebrafish. Scale bar represents 50  $\mu$ m.

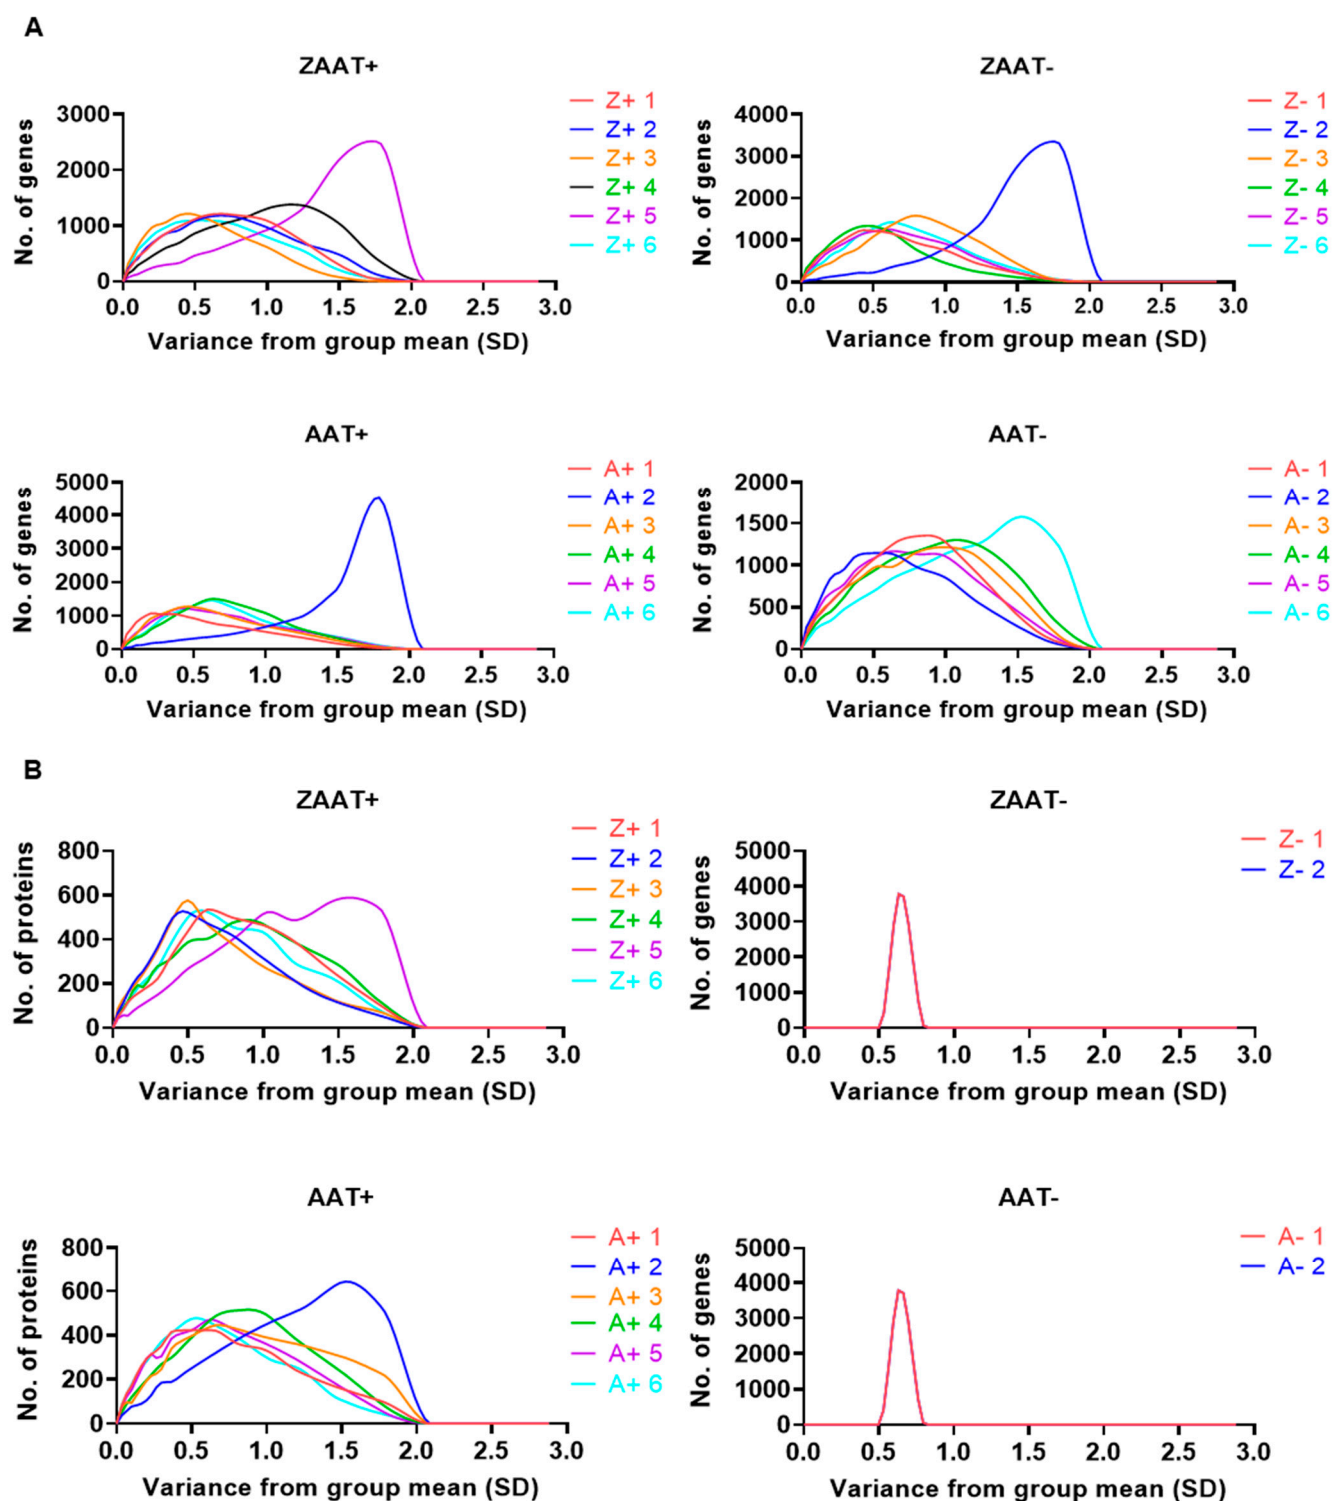

**Figure S2. Variation analysis identifies outlier in bioinformatic experiments.**

RPKM from RNA-seq and protein counts from LCMS/MS were converted into Z-scores. The number of genes/proteins is plotted against the absolute values of Z-score. Variation analysis of **a)** RNA-seq data identified 1 out of 6 fish in each group (Z+ 5, Z- 2, A+ 2 and A- 6) as outlier, and in **b)** LCMS data, one transgenic fish was identified as outlier in each transgenic group (A+ 2, Z+ 5), consistent RNA-seq. No outlier was identified from non-transgenic sibling groups due to small sample size. These samples were excluded in the downstream differential expression analysis.

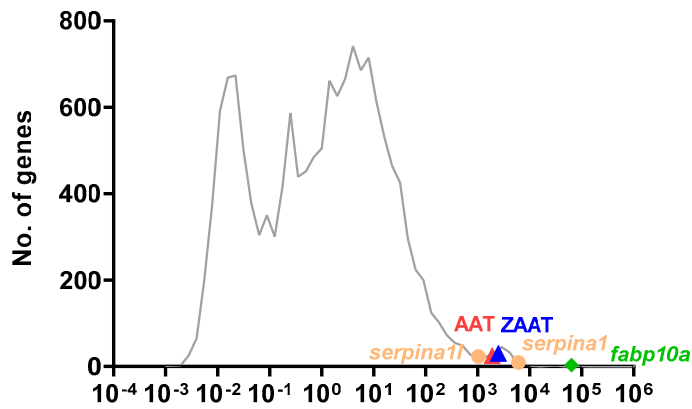

**Figure S3. Comparison of transgene expression to endogenous antitrypsin.**

Frequency distribution of protein-coding transcripts in zebrafish livers from RNA-seq data, averaging RPKM for each gene from all fish across the four genotype groups. The red triangle indicates the expression of AAT and blue triangle indicates the expression of the ZAAT transgene.

|                          | Proteomics |       | Transcriptomics |       |
|--------------------------|------------|-------|-----------------|-------|
| Student's t-test         | Min        | Max   | Min             | Max   |
| Z+ vs. A+                | 0.000      | 0.050 | 0.000           | 0.010 |
| Z+ vs. [A+Z+]            | 0.000      | 0.250 | 0.000           | 0.010 |
| Z+ vs. Z-                | 0.000      | 0.250 | 0.000           | 0.010 |
| Z- vs. A-                | 0.050      | 1.000 | 0.050           | 1.000 |
| [FDR] threshold          | 0.250      |       | 0.010           |       |
| Differential exp genes   | 77         |       | 435             |       |
| % of total peptide/genes | 1.74%      |       | 1.54%           |       |

**Figure S4. Statistical parameters used dysregulation expression analysis**

|                                                                           |                    |                      |
|---------------------------------------------------------------------------|--------------------|----------------------|
| Summary of Analysis - Analysis - Data - Human gene filtered 2(1)          |                    |                      |
| <b>Top Canonical Pathways</b>                                             |                    |                      |
| Name                                                                      | p-value            | Overlap              |
| Superpathway of Cholesterol Biosynthesis                                  | 2.06E-14           | 44.4 % 12/27         |
| Cholesterol Biosynthesis I                                                | 1.18E-09           | 53.8 % 7/13          |
| Cholesterol Biosynthesis II (via 24,25-dihydrolanosterol)                 | 1.18E-09           | 53.8 % 7/13          |
| Cholesterol Biosynthesis III (via Desmosterol)                            | 1.18E-09           | 53.8 % 7/13          |
| Superpathway of Geranylgeranyldiphosphate Biosynthesis I (via Mevalonate) | 8.19E-06           | 31.2 % 5/16          |
| <b>Top Upstream Regulators</b>                                            |                    |                      |
| Upstream Regulator                                                        | p-value of overlap | Predicted Activation |
| SH3TC2                                                                    | 1.16E-12           |                      |
| SREBF2                                                                    | 7.25E-10           | Inhibited            |
| SCAP                                                                      | 1.45E-09           | Inhibited            |
| SIRT2                                                                     | 2.83E-08           | Inhibited            |
| pitavastatin                                                              | 6.33E-08           | Inhibited            |

**Figure S5. Ingenuity pathway analysis of RNA-seq data.**

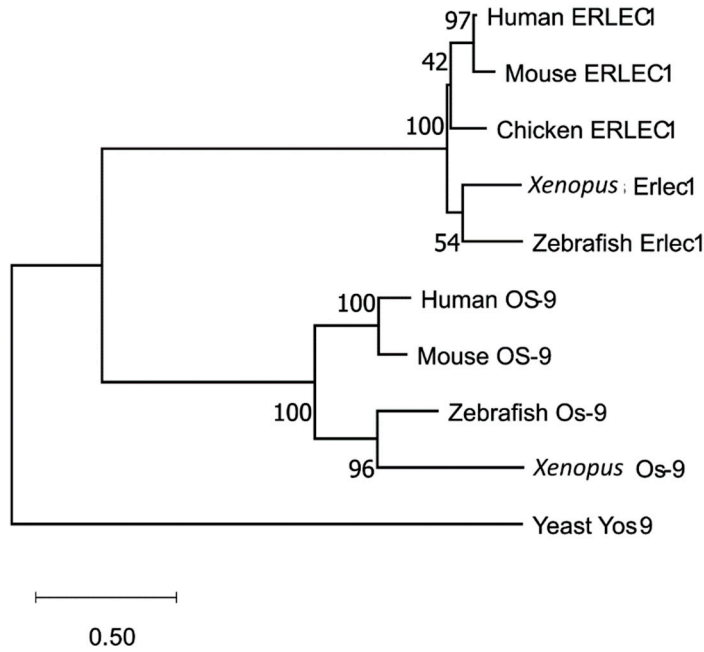

**Figure S6. Phylogenetic analysis of ER lectins.**

ERLEC1 and OS-9 protein sequences from human, mouse, chicken, *Xenopus*, zebrafish, and yeast were aligned using Clustal-W. Evolutionary history was inferred by using the Maximum Likelihood method and Jones et al. w/freq. model. The tree was calculated from the alignment using Molecular Evolutionary Genetics Analysis software, version 10 (MEGA X). The percentage of trees in which the associated taxa clustered together in the bootstrap test (1000 replicates) are shown next to the branches. Initial tree(s) for the heuristic search were obtained automatically by applying Neighbor-Join and BioNJ algorithms to a matrix of pairwise distances estimated using the Jones-Taylor-Thornton (JTT) model. Scale bar refers to an evolutionary distance (number of substitutions per site) of 0.5.

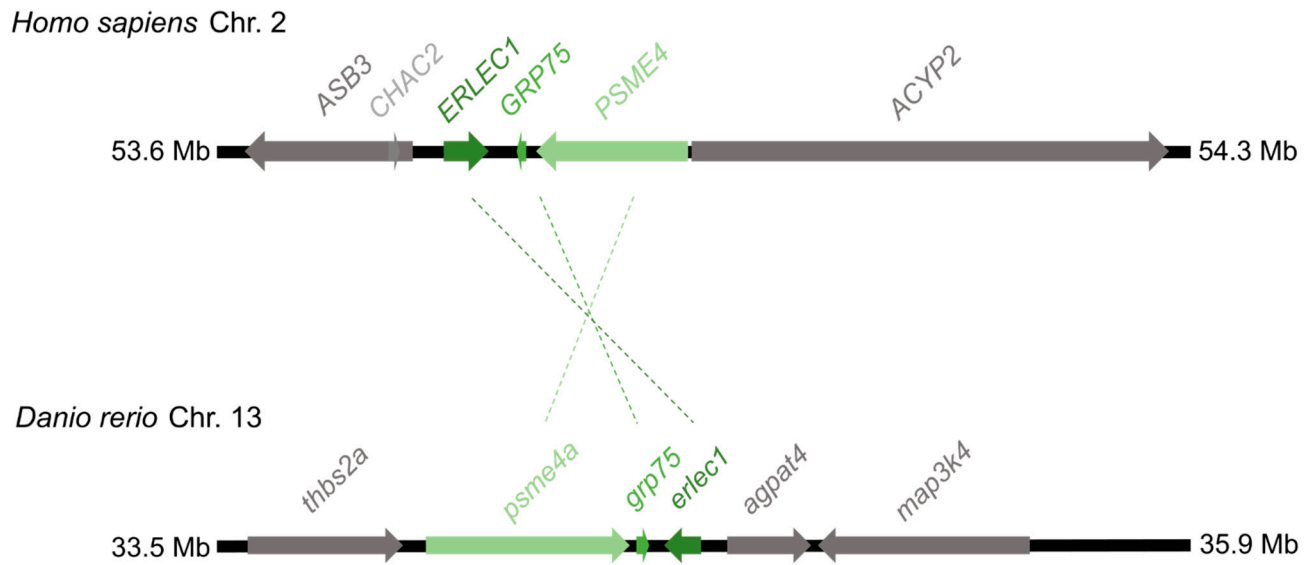

**Figure S7. Synteny relationships of *erlec1* gene loci in human and zebrafish.**

Mapped genomes of *Homo sapiens* and *Danio rerio* were used to identify conserved gene neighbours of *erlec1*.



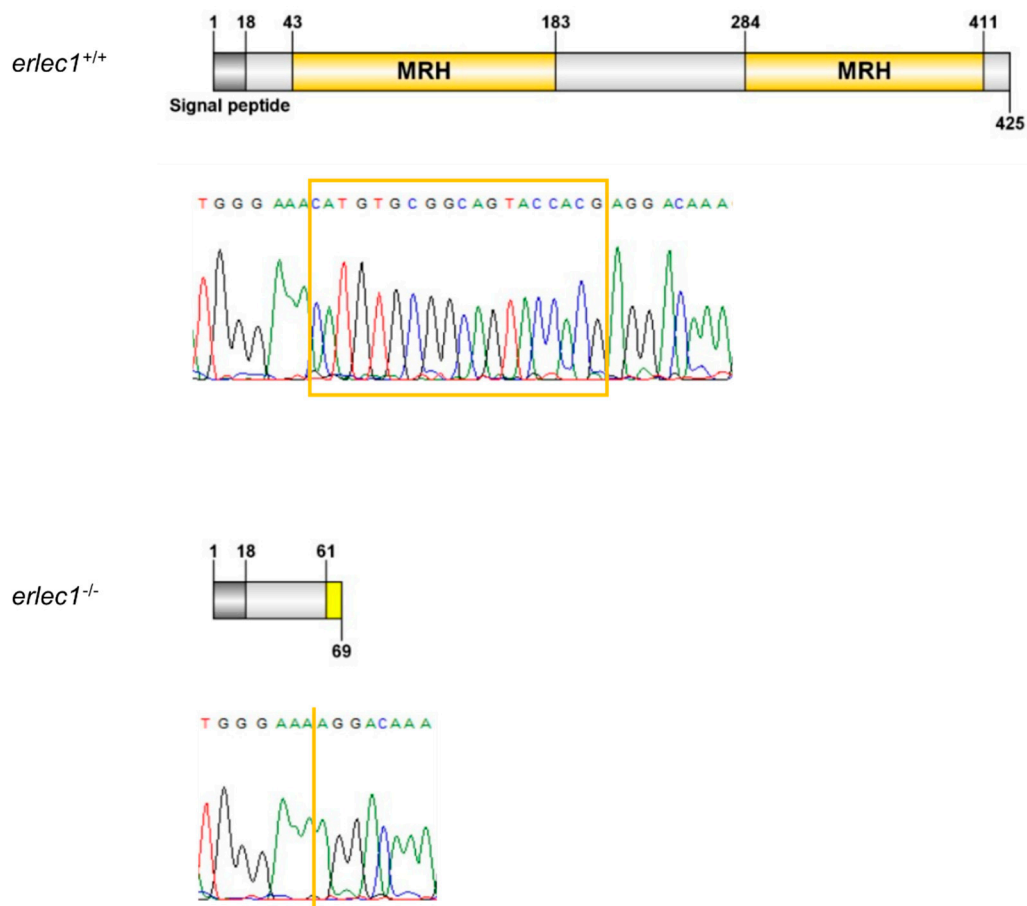

**Figure S8. Sequence validation of *erlec1* mutant.**

Sequencing of generation F2 homozygotes confirmed a 19 bp deletion at nucleotide positions 184-202 (outlined in yellow), resulting in a frameshift that added 8 amino acids (light yellow) from position 61 before a stop codon. MRH = mannose-6-phosphate receptor homology domain.

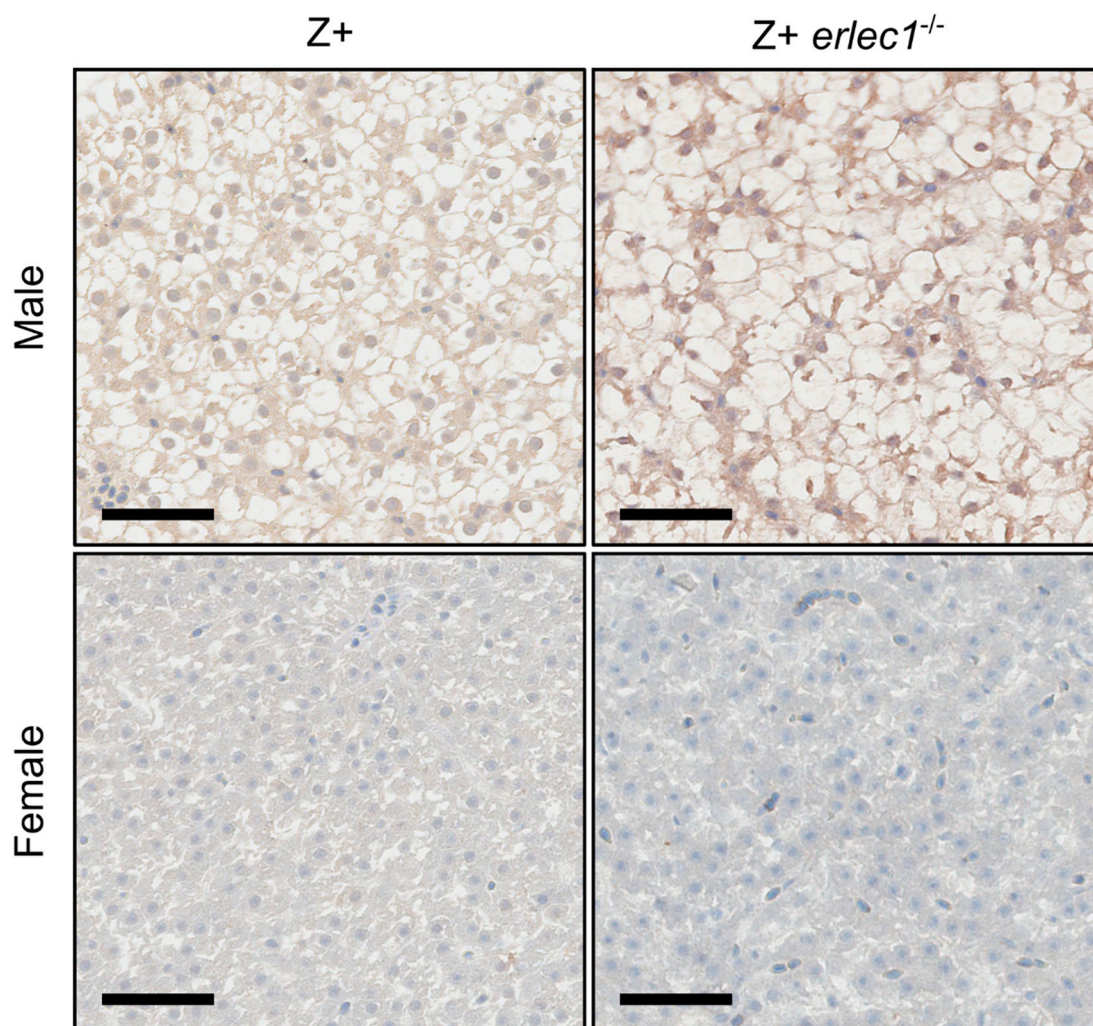

**Figure S9. Immunohistochemical staining of *erlec1* mutant expressing ZAAT.**

Representative images of 3 μm thick paraffin zebrafish liver sections stained for human antitrypsin. Scale bar represents 50 μm.

### Rep 1

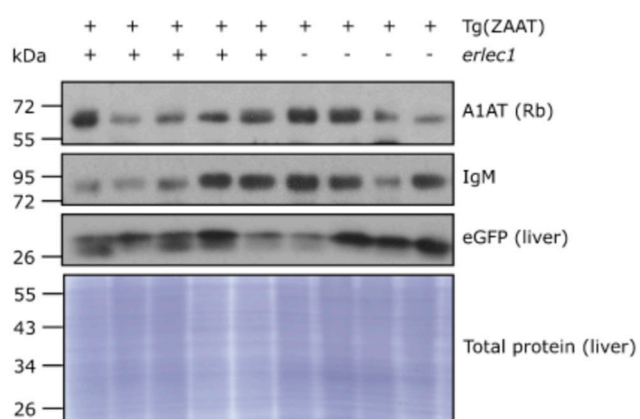

### Rep 2

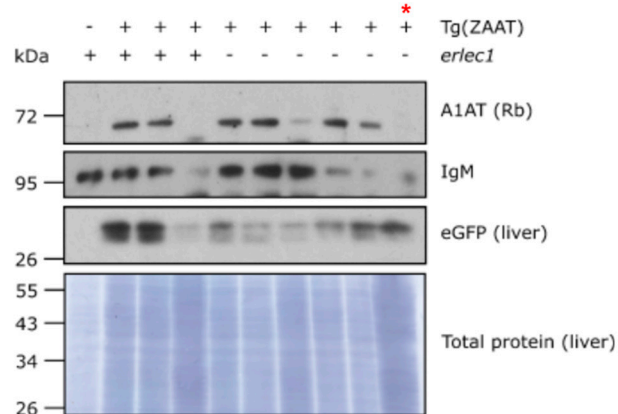

### Rep 3

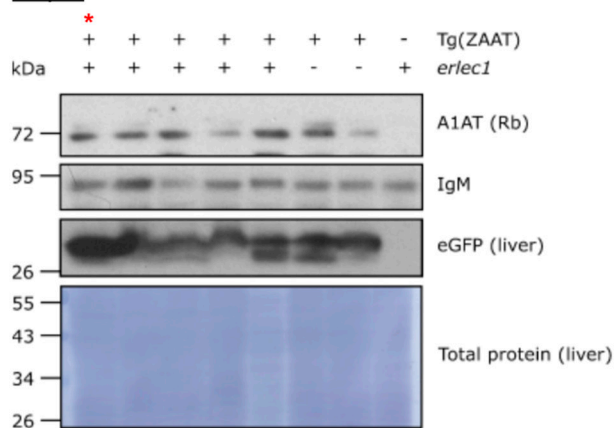

### Rep 4

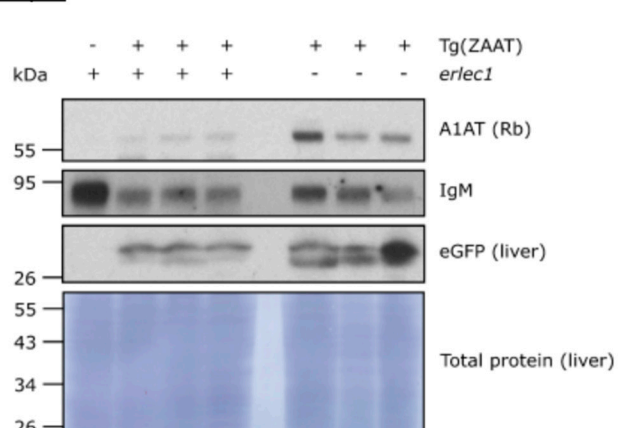

**Figure S10. Immunoblots indicating the circulating levels of ZAAT in *erlec1*<sup>-/-</sup> zebrafish.**

Red asterisks indicate outliers determined by the ROUT method (Q=1%), and these data are excluded from the analysis.



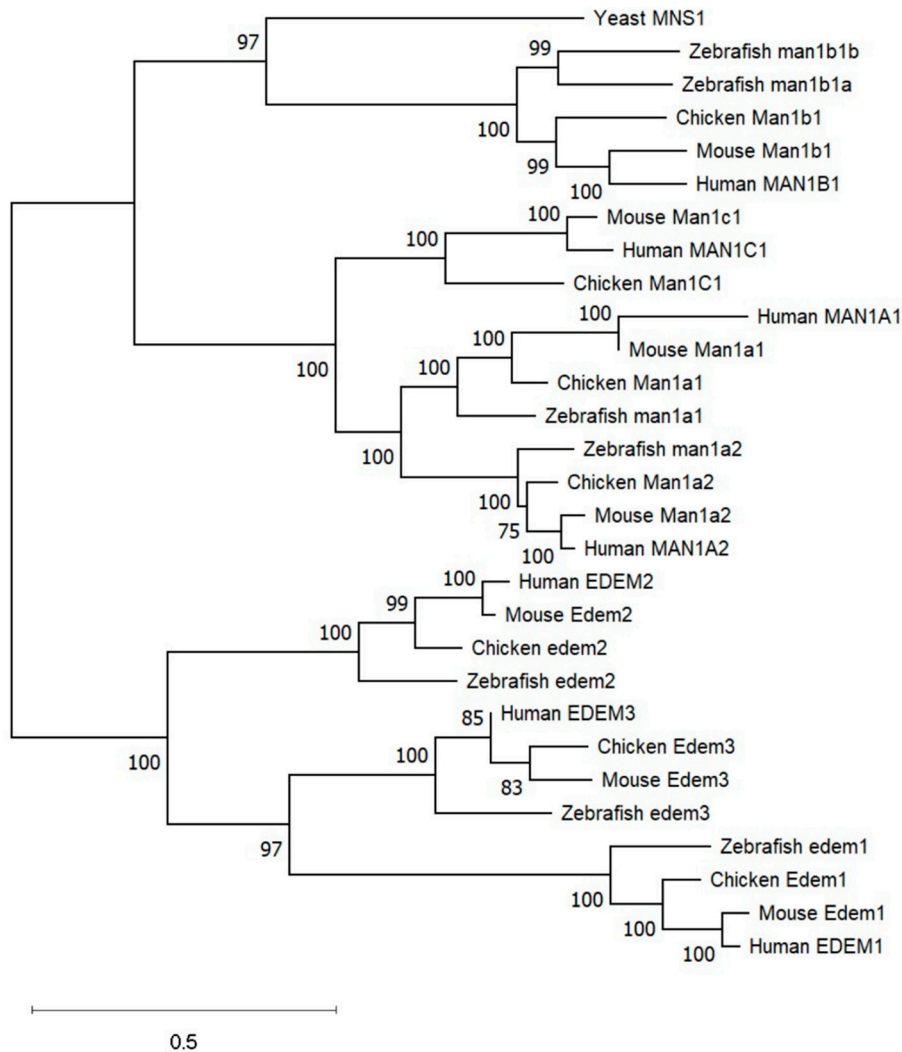

**Figure S11. Phylogenetic analysis of glycoside hydrolase family 47 proteins.**

Glycoside hydrolase family 47 (GH47) protein sequences from human, mouse, chicken, zebrafish, and yeast were aligned using Clustal-W. Evolutionary history was inferred by using the Maximum Likelihood method and Jones *et al.* w/freq. model. The tree was calculated from the alignment using Molecular Evolutionary Genetics Analysis software, version 10 (MEGA X). The percentage of trees in which the associated taxa clustered together in the bootstrap test (1000 replicates) are shown next to the branches. Initial tree(s) for the heuristic search were obtained automatically by applying Neighbor-Join and BioNJ algorithms to a matrix of pairwise distances estimated using the Jones-Taylor-Thornton (JTT) model. Scale bar refers to an evolutionary distance (number of substitutions per site) of 0.5.

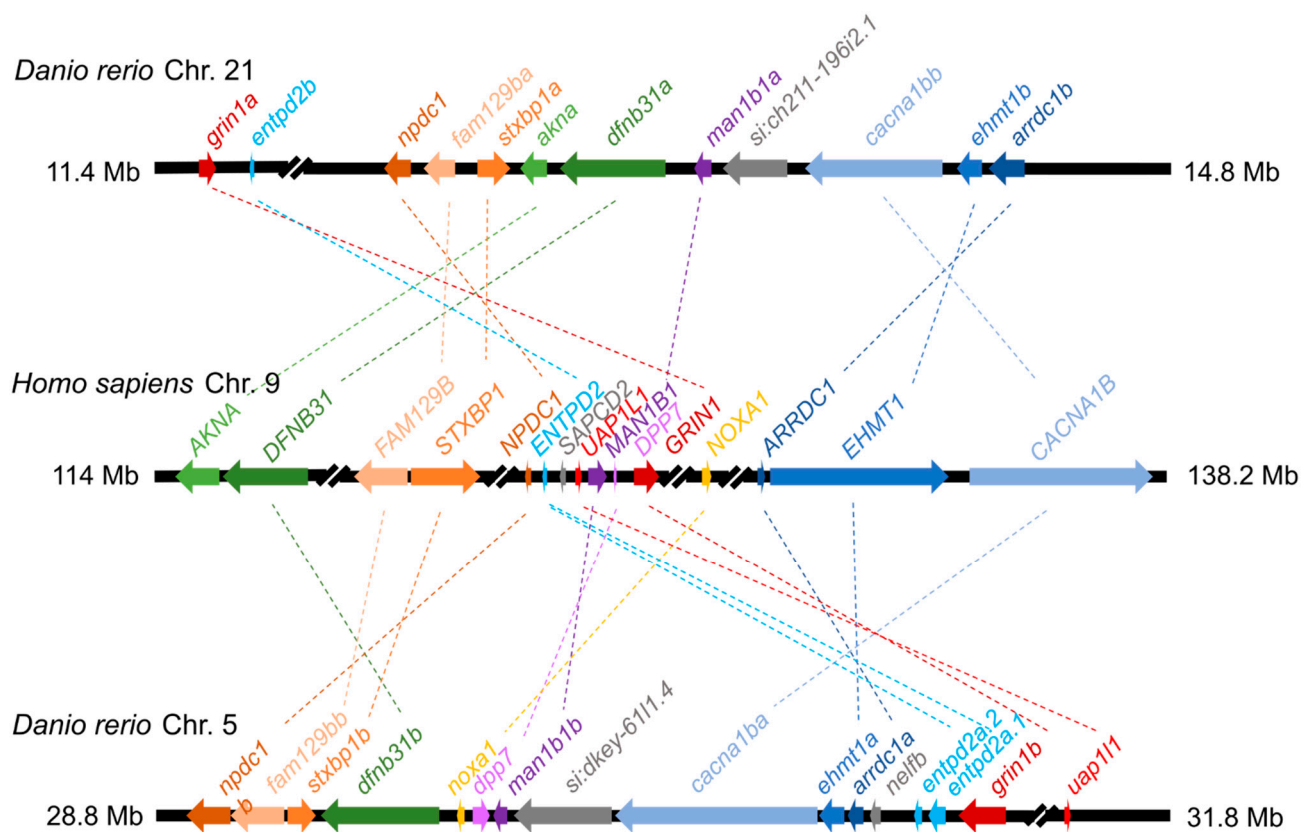

**Figure S12. Synteny relationships of *man1b1* gene loci in human and zebrafish.**

Mapped genomes of *Homo sapiens* and *Danio rerio* were used to identify conserved gene neighbours of *man1b1a* and *man1b1b*.

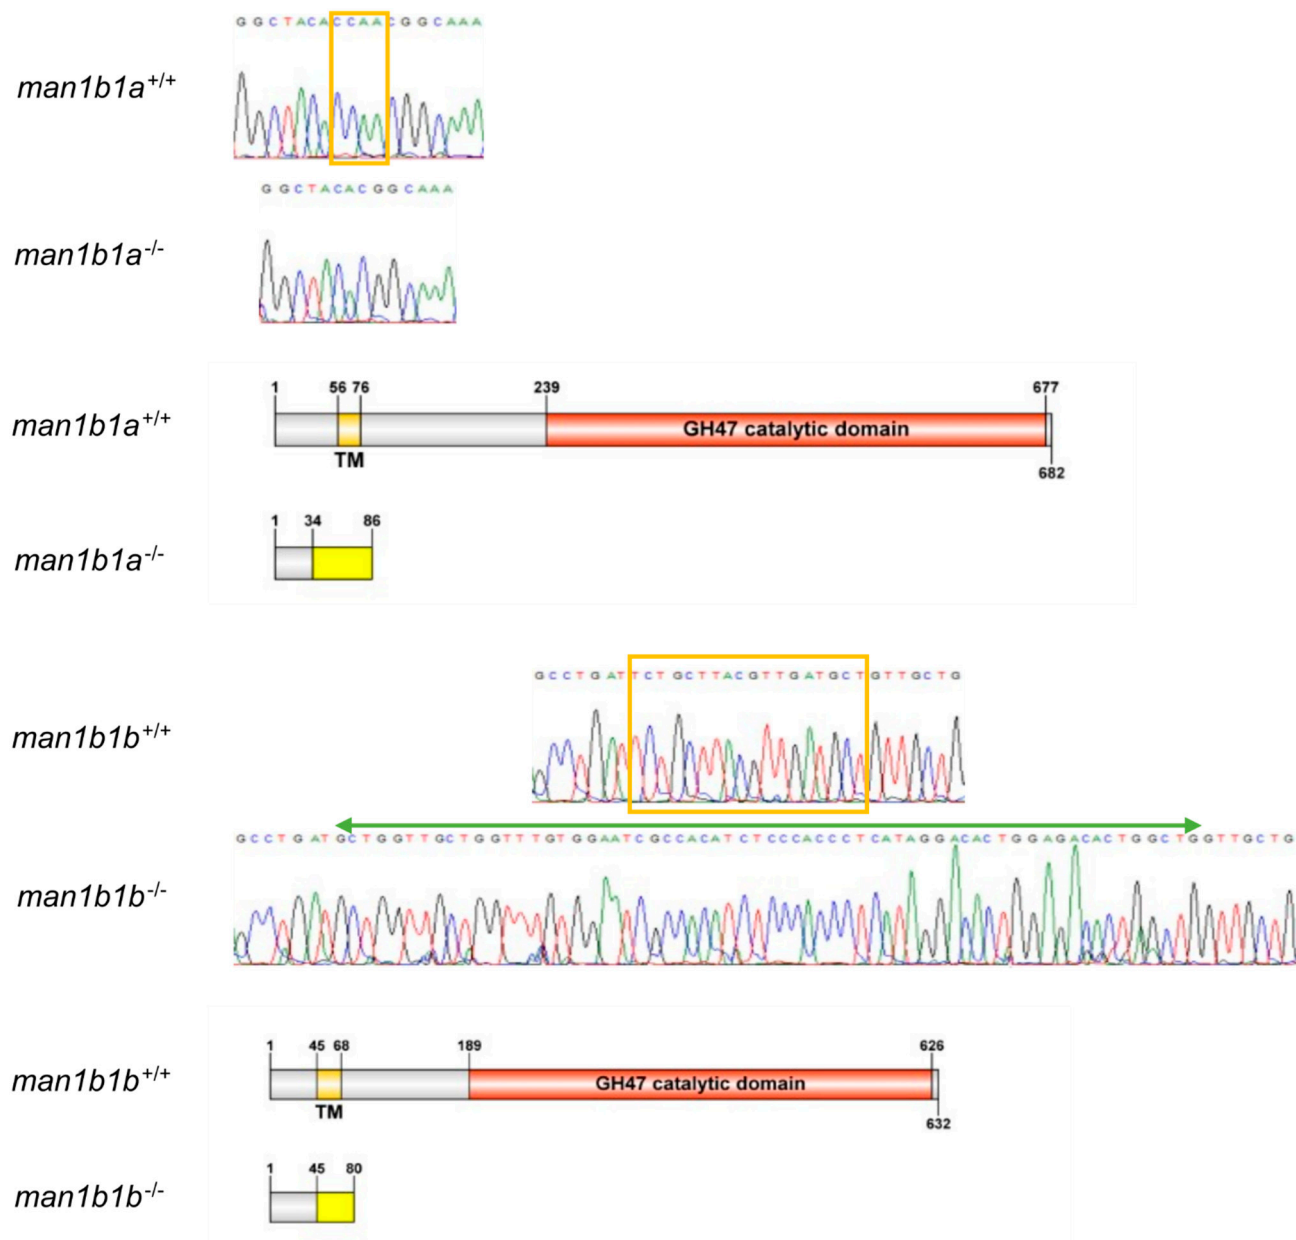

**Figure S13. Sequence validation of *man1b1a* and *man1b1b* mutants.**

Sequencing of F2 homozygotes confirms a 4 bp deletion at positions 101-104 for *man1b1a*, resulting in frameshift leading to insertion of 52 amino acids (yellow) at position 34 followed by a premature stop codon. Sequencing of *man1b1b* screening PCR product confirms an 18 bp deletion (outlined in yellow) with 65 bp insertion (indicated by green arrow), resulting in a net insertion of 47 bp and a frameshift leading to insertion of 35 amino acids (yellow) at position 45 followed by a premature stop codon. TM = transmembrane domain.

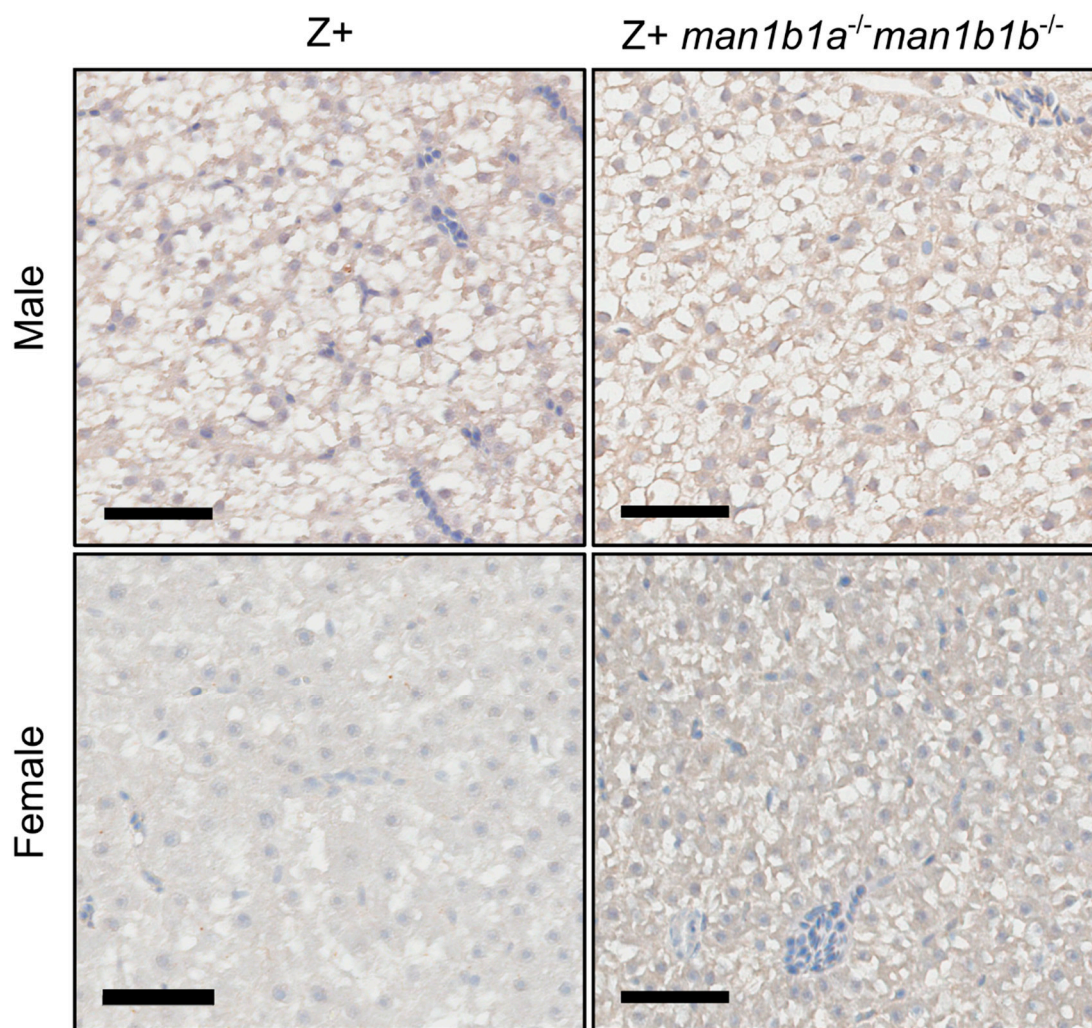

**Figure S14. Immunohistochemical staining of *man1b1* double mutant expressing ZAAT.**

Representative images of 3  $\mu$ m thick paraffin zebrafish liver sections stained for human antitrypsin. Scale bar represents 50  $\mu$ m.

### Rep 1

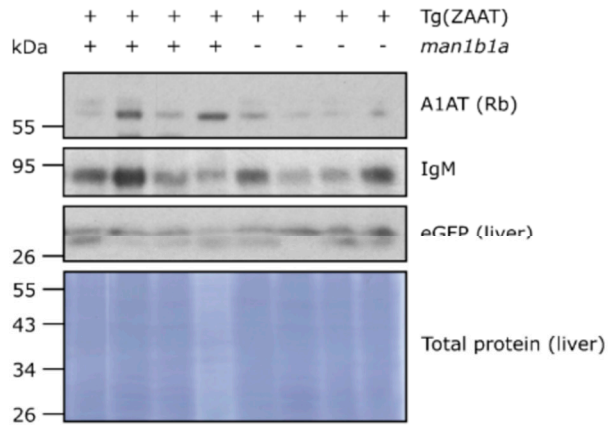

### Rep 2

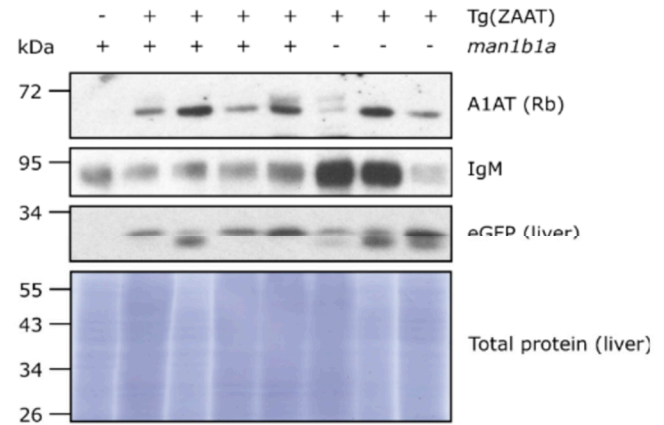

### Rep 3

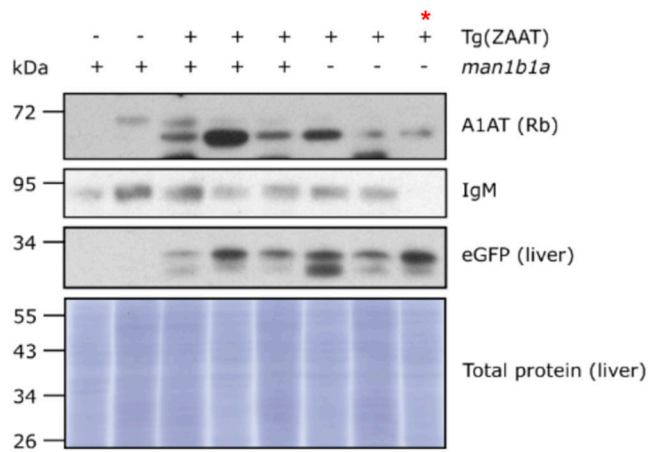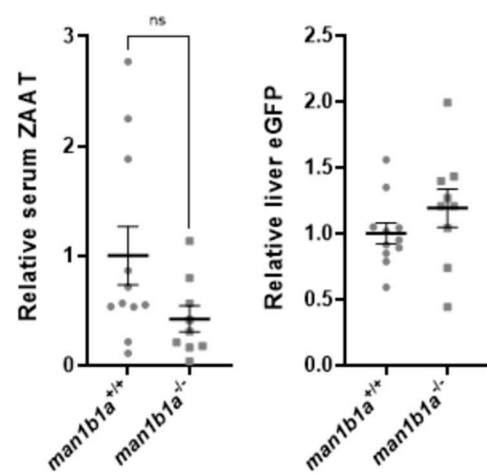

**Figure S15. Immunoblots indicating the circulating levels of ZAAT in *man1b1a*<sup>-/-</sup> zebrafish.**

Red asterisks indicate outliers determined by the ROUT method (Q=1%), and these data are excluded from the analysis. Bottom right panel shows quantitation of protein signal by densitometry pooled from three independent experiments, with each point representing an individual fish. Statistical significance was determined by Unpaired Student's t-test. ns = non-significant.



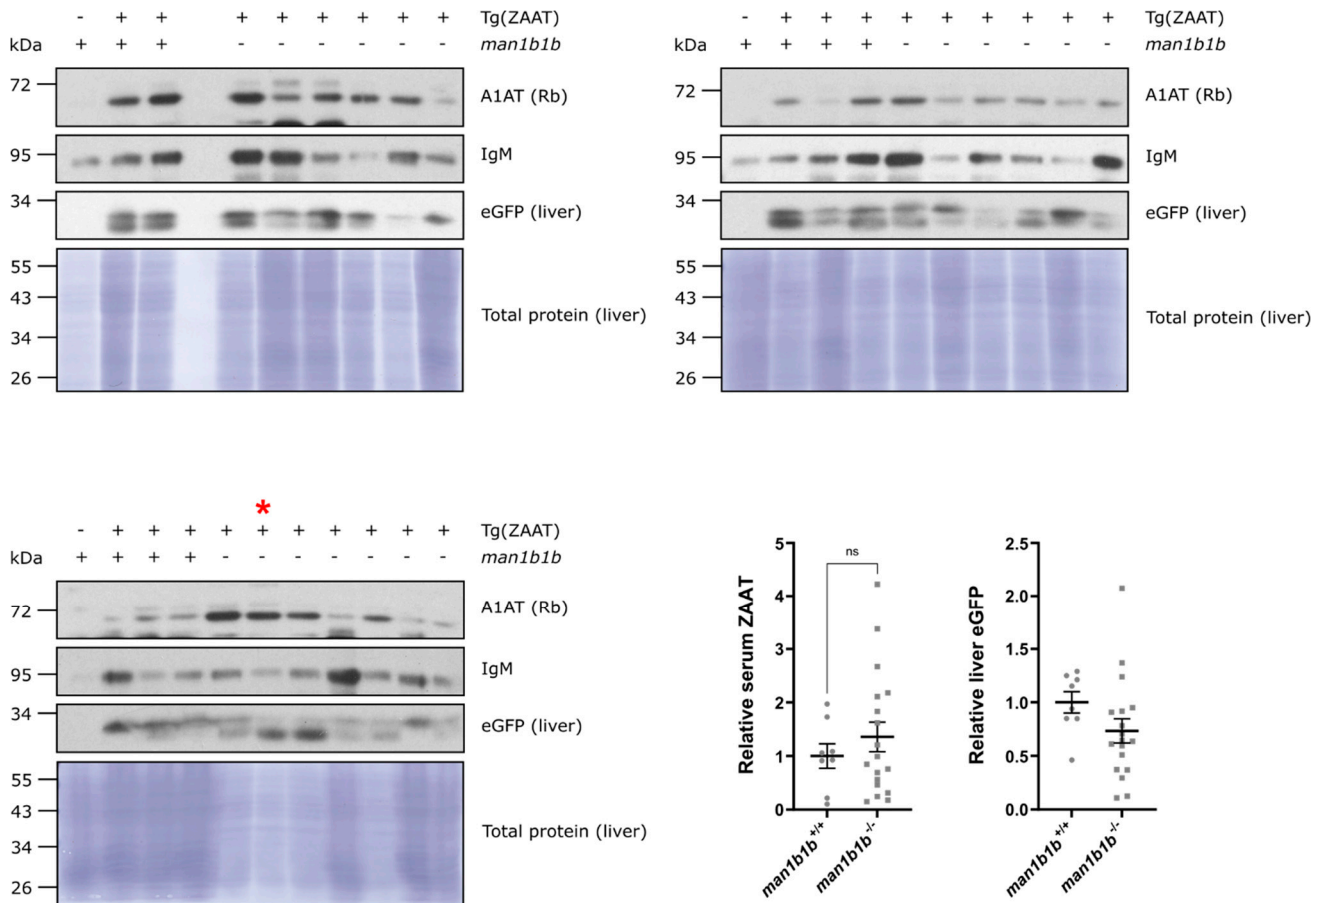

**Figure S16. Immunoblots indicating the circulating levels of ZAAT in *man1b1b*<sup>-/-</sup> zebrafish**

Red asterisks indicate outliers determined by the ROUT method (Q=1%), and these data are excluded from the analysis. Bottom right panel shows quantitation of protein signal by densitometry pooled from three independent experiments, with each point representing an individual fish. Statistical significance was determined by Unpaired Student's t-test. ns = non-significant.

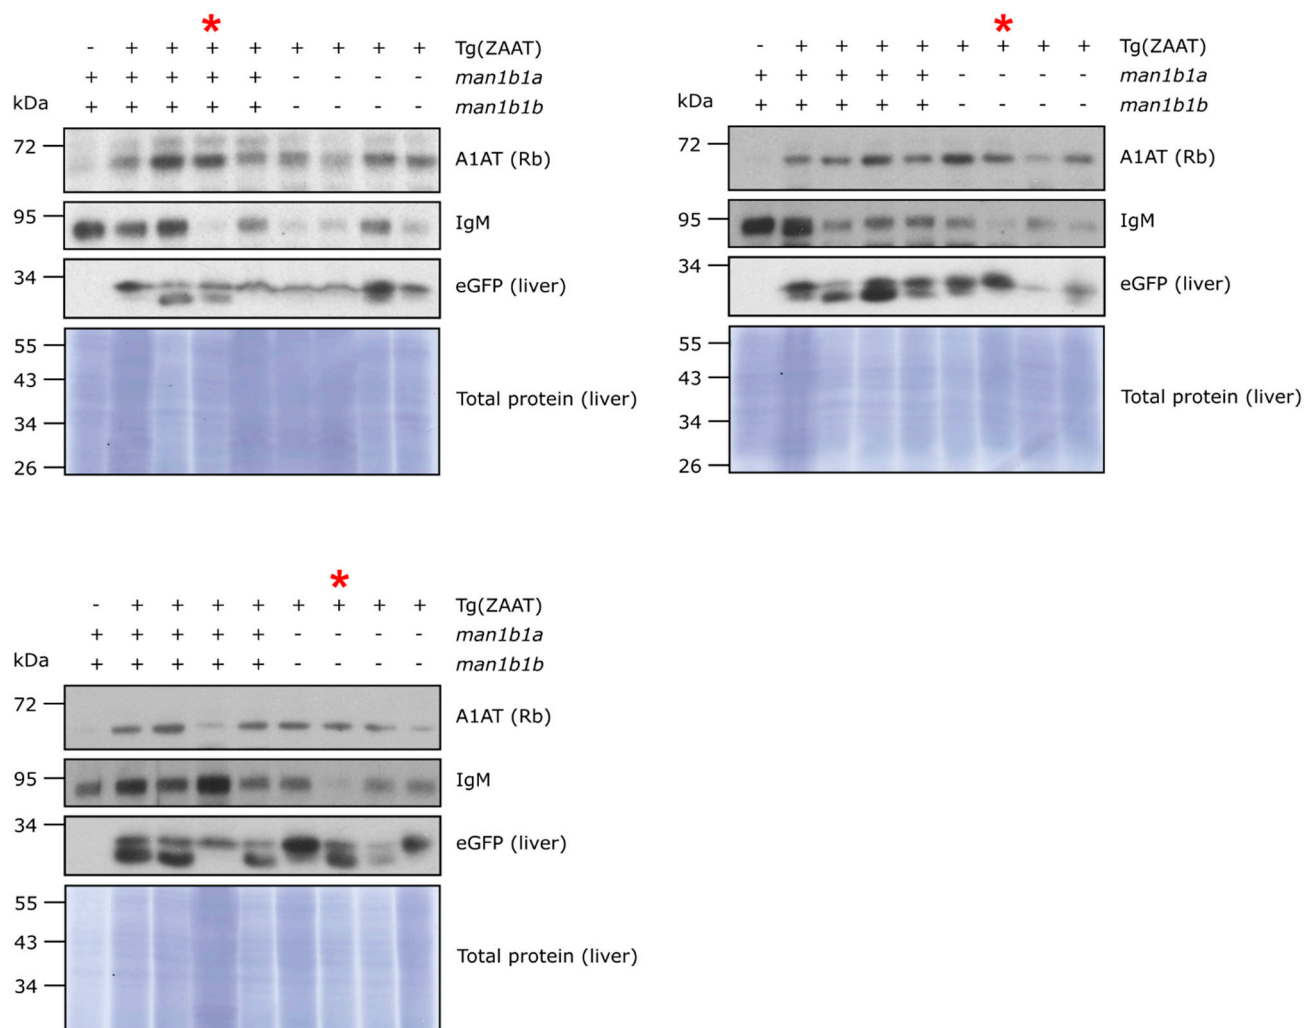

**Figure S17. Immunoblots indicating the circulating levels of ZAAT in *man1b1a*<sup>-/-</sup> *man1b1b*<sup>-/-</sup> zebrafish.**

Red asterisks indicate outliers determined by the ROUT method (Q=1%), and these data are excluded from the analysis.

**Table S1. List of DEGs identified from RNA-seq**

| Gene                     | Product                                                                                                                      | Z+/A+ | A+/A- | Z+/Z- |
|--------------------------|------------------------------------------------------------------------------------------------------------------------------|-------|-------|-------|
| <i>klhl24b</i>           | kelch-like family member 24b                                                                                                 | 16.89 | 0.86  | 12.13 |
| <i>frmd4bb</i>           | FERM domain containing 4Bb                                                                                                   | 16.35 | 0.56  | 8.00  |
| <i>bco2l</i>             | beta-carotene 15, 15-dioxygenase 2, like                                                                                     | 8.13  | 1.72  | 5.86  |
| <i>fam222a</i>           | family with sequence similarity 222, member A                                                                                | 6.24  | 0.60  | 4.89  |
| <i>ulk2</i>              | unc-51 like autophagy activating kinase 2                                                                                    | 6.17  | 1.25  | 6.45  |
| <i>lmbr1l</i>            | limb development membrane protein 1-like                                                                                     | 6.16  | 0.53  | 2.23  |
| <i>fbxo25</i>            | F-box protein 25                                                                                                             | 6.05  | 1.77  | 9.06  |
| <i>si:ch211-232d10.1</i> | si:ch211-232d10.1                                                                                                            | 5.73  | 0.91  | 3.36  |
| <i>exo5</i>              | exonuclease 5                                                                                                                | 5.4   | 1.00  | 5.10  |
| <i>ulk1a</i>             | unc-51 like autophagy activating kinase 1a                                                                                   | 5.27  | 0.95  | 5.90  |
| <i>cyhr1</i>             | cysteine/histidine-rich 1                                                                                                    | 5.23  | 0.51  | 2.68  |
| <i>tle3b</i>             | transducin-like enhancer of split 3b                                                                                         | 5.13  | 1.05  | 8.28  |
| <i>mtx3</i>              | metaxin 3                                                                                                                    | 5.11  | 1.32  | 4.76  |
| <i>trim44</i>            | tripartite motif containing 44                                                                                               | 4.95  | 0.85  | 3.46  |
| <i>si:ch73-386h18.1</i>  | si:ch73-386h18.1                                                                                                             | 4.95  | 0.80  | 4.20  |
| <i>irs2a</i>             | insulin receptor substrate 2a                                                                                                | 4.84  | 0.86  | 3.51  |
| <i>klhl32</i>            | kelch-like family member 32                                                                                                  | 4.52  | 1.55  | 4.82  |
| <i>crbn</i>              | cereblon                                                                                                                     | 4.37  | 1.02  | 3.23  |
| <i>stk11ip</i>           | serine/threonine kinase 11 interacting protein                                                                               | 4.34  | 0.68  | 5.66  |
| <i>pel12</i>             | pellino E3 ubiquitin protein ligase family member 2                                                                          | 4.21  | 0.66  | 3.68  |
| <i>slc34a2b</i>          | solute carrier family 34 (type II sodium/phosphate cotransporter), member 2b                                                 | 4.14  | 0.84  | 3.58  |
| <i>abo</i>               | ABO blood group (transferase A, alpha 1-3-N-acetylgalactosaminyltransferase; transferase B, alpha 1-3-galactosyltransferase) | 4.08  | 1.68  | 6.87  |
| <i>tesk2</i>             | testis-specific kinase 2                                                                                                     | 4.08  | 0.61  | 3.29  |
| <i>invs</i>              | inversin                                                                                                                     | 4.04  | 0.95  | 2.69  |
| <i>fir67</i>             | finTRIM family, member 67                                                                                                    | 4.02  | 0.89  | 3.41  |
| <i>nav2b</i>             | neuron navigator 2b                                                                                                          | 3.99  | 1.09  | 4.38  |
| <i>sik2a</i>             | salt-inducible kinase 2a                                                                                                     | 3.96  | 1.75  | 6.32  |
| <i>tbc1a</i>             | tubulin folding cofactor E-like a                                                                                            | 3.95  | 1.10  | 4.03  |
| <i>rapgef3</i>           | Rap guanine nucleotide exchange factor (GEF) 3                                                                               | 3.9   | 0.49  | 3.12  |
| <i>cyp2r1</i>            | cytochrome P450, family 2, subfamily R, polypeptide 1                                                                        | 3.83  | 1.11  | 4.23  |
| <i>nr2c2</i>             | nuclear receptor subfamily 2, group C, member 2                                                                              | 3.66  | 0.76  | 2.87  |
| <i>cyl1da</i>            | cylindromatosis (turban tumor syndrome), a                                                                                   | 3.65  | 0.66  | 1.97  |
| <i>nocta</i>             | nocturnin a                                                                                                                  | 3.62  | 0.95  | 2.46  |
| <i>hfe2</i>              | hemochromatosis type 2                                                                                                       | 3.59  | 0.74  | 3.56  |
| <i>lmbrd2b</i>           | LMBR1 domain containing 2b                                                                                                   | 3.56  | 0.69  | 2.17  |
| <i>ankib1b</i>           | ankyrin repeat and IBR domain containing 1b                                                                                  | 3.52  | 0.94  | 3.51  |
| <i>rmdn2</i>             | regulator of microtubule dynamics 2                                                                                          | 3.5   | 1.70  | 5.10  |
| <i>katnal1</i>           | katanin p60 subunit A-like 1                                                                                                 | 3.49  | 0.90  | 2.33  |
| <i>mtmr3</i>             | myotubularin related protein 3                                                                                               | 3.49  | 1.21  | 3.84  |
| <i>evi5b</i>             | ecotropic viral integration site 5b                                                                                          | 3.47  | 0.90  | 4.26  |
| <i>dcun1d4</i>           | DCN1, defective in cullin neddylation 1, domain containing 4 (S. cerevisiae)                                                 | 3.44  | 1.01  | 4.44  |
| <i>tada2a</i>            | transcriptional adaptor 2A                                                                                                   | 3.34  | 0.91  | 2.89  |

|                          |                                                                           |      |      |      |
|--------------------------|---------------------------------------------------------------------------|------|------|------|
| <i>bnip4</i>             | BCL2 interacting protein 4                                                | 3.33 | 0.79 | 2.41 |
| <i>pomk</i>              | protein-O-mannose kinase                                                  | 3.29 | 0.88 | 2.79 |
| <i>wu:fb44b02</i>        | wu:fb44b02                                                                | 3.23 | 1.21 | 2.99 |
| <i>wdr26a</i>            | WD repeat domain 26a                                                      | 3.21 | 0.80 | 2.66 |
| <i>ssfa2</i>             | sperm specific antigen 2                                                  | 3.12 | 0.73 | 1.80 |
| <i>kifap3a</i>           | kinesin-associated protein 3a                                             | 3.08 | 0.87 | 2.00 |
| <i>syne3</i>             | spectrin repeat containing, nuclear envelope family member 3              | 3.07 | 1.27 | 3.76 |
| <i>FO834800.1</i>        |                                                                           | 3.01 | 0.50 | 2.01 |
| <i>wdr24</i>             | WD repeat domain 24                                                       | 3    | 1.31 | 3.73 |
| <i>fam222ba</i>          | family with sequence similarity 222, member Ba                            | 2.97 | 0.96 | 3.84 |
| <i>si:dkey-38p12.3</i>   | si:dkey-38p12.3                                                           | 2.95 | 0.90 | 2.77 |
| <i>map3k4</i>            | mitogen-activated protein kinase kinase kinase 4                          | 2.94 | 1.05 | 3.05 |
| <i>creb3l2</i>           | cAMP responsive element binding protein 3-like 2                          | 2.93 | 0.90 | 3.14 |
| <i>rufy2</i>             | RUN and FYVE domain containing 2                                          | 2.91 | 1.11 | 2.57 |
| <i>si:dkey-40c23.1</i>   | si:dkey-40c23.1                                                           | 2.91 | 1.44 | 2.99 |
| <i>rassf3</i>            | Ras association (RalGDS/AF-6) domain family member 3                      | 2.9  | 1.24 | 2.10 |
| <i>agtpbp1</i>           | ATP/GTP binding protein 1                                                 | 2.88 | 0.77 | 1.88 |
| <i>mtmr11</i>            | myotubularin related protein 11                                           | 2.81 | 1.56 | 4.06 |
| <i>nr3c1</i>             | nuclear receptor subfamily 3, group C, member 1 (glucocorticoid receptor) | 2.8  | 0.88 | 2.50 |
| <i>fam160b2</i>          | family with sequence similarity 160, member B2                            | 2.79 | 1.01 | 2.73 |
| <i>cpeb3</i>             | cytoplasmic polyadenylation element binding protein 3                     | 2.72 | 0.18 | 0.38 |
| <i>si:dkey-246g23.4</i>  | si:dkey-246g23.4                                                          | 2.71 | 1.97 | 6.82 |
| <i>coq8a</i>             | coenzyme Q8A                                                              | 2.71 | 0.87 | 2.25 |
| <i>scube2</i>            | signal peptide, CUB domain, EGF-like 2                                    | 2.7  | 1.22 | 2.73 |
| <i>ulk1b</i>             | unc-51 like autophagy activating kinase 1                                 | 2.69 | 1.56 | 3.86 |
| <i>si:dkey-249d8.1</i>   | si:dkey-249d8.1                                                           | 2.69 | 0.88 | 1.97 |
| <i>stard3</i>            | StAR-related lipid transfer (START) domain containing 3                   | 2.68 | 0.63 | 1.78 |
| <i>arhgef16</i>          | Rho guanine nucleotide exchange factor (GEF) 16                           | 2.68 | 1.51 | 2.79 |
| <i>rab11bb</i>           | RAB11B, member RAS oncogene family, b                                     | 2.67 | 0.81 | 1.84 |
| <i>hdac6</i>             | histone deacetylase 6                                                     | 2.67 | 0.85 | 1.97 |
| <i>stag2a</i>            | stromal antigen 2a                                                        | 2.67 | 0.81 | 2.00 |
| <i>si:ch211-235o23.1</i> | si:ch211-235o23.1                                                         | 2.65 | 0.79 | 2.01 |
| <i>nlrc5</i>             | NLR family, CARD domain containing 5                                      | 2.65 | 0.90 | 2.46 |
| <i>fncl3a</i>            | fibronectin type III domain containing 3A                                 | 2.64 | 0.76 | 2.27 |
| <i>si:dkey-29p10.4</i>   | si:dkey-29p10.4                                                           | 2.61 | 0.71 | 1.91 |
| <i>brip1</i>             | BRCA1 interacting protein C-terminal helicase 1                           | 2.61 | 1.40 | 2.89 |
| <i>zfyve26</i>           | zinc finger, FYVE domain containing 26                                    | 2.59 | 0.80 | 2.31 |
| <i>gfod2</i>             | glucose-fructose oxidoreductase domain containing 2                       | 2.58 | 1.03 | 3.25 |
| <i>lrrc45</i>            | leucine rich repeat containing 45                                         | 2.58 | 1.24 | 3.20 |
| <i>zbtb41</i>            | zinc finger and BTB domain containing 41                                  | 2.58 | 1.25 | 3.01 |
| <i>vrk2</i>              | vaccinia related kinase 2                                                 | 2.57 | 0.84 | 1.78 |
| <i>irgf1</i>             | immunity-related GTPase family, f1                                        | 2.56 | 0.80 | 1.87 |
| <i>zgc:100832</i>        | zgc:100832                                                                | 2.54 | 0.95 | 2.22 |
| <i>inpp4aa</i>           | inositol polyphosphate-4-phosphatase type I Aa                            | 2.54 | 1.49 | 3.41 |
| <i>si:dkey-205i10.1</i>  | si:dkey-205i10.1                                                          | 2.54 | 1.63 | 4.08 |
| <i>ghdc</i>              | GH3 domain containing                                                     | 2.53 | 0.88 | 1.87 |
| <i>kif7</i>              | kinesin family member 7                                                   | 2.52 | 1.24 | 2.64 |

|                          |                                                                                       |      |      |       |
|--------------------------|---------------------------------------------------------------------------------------|------|------|-------|
| <i>irf2</i>              | interferon regulatory factor 2                                                        | 2.52 | 0.95 | 2.55  |
| <i>senp7b</i>            | SUMO1/sentrin specific peptidase 7b                                                   | 2.51 | 1.26 | 3.63  |
| <i>si:ch211-85n16.4</i>  | si:ch211-85n16.4                                                                      | 2.5  | 0.92 | 2.58  |
| <i>met</i>               | MET proto-oncogene, receptor tyrosine kinase                                          | 2.49 | 0.82 | 3.12  |
| <i>nfkbie</i>            | nuclear factor of kappa light polypeptide gene enhancer in B-cells inhibitor, epsilon | 2.49 | 1.03 | 3.66  |
| <i>zranb1b</i>           | zinc finger, RAN-binding domain containing 1b                                         | 2.47 | 1.20 | 3.12  |
| <i>flcn</i>              | folliculin                                                                            | 2.47 | 0.79 | 1.71  |
| <i>unkl</i>              | unkempt family zinc finger-like                                                       | 2.47 | 0.92 | 1.89  |
| <i>si:ch211-216l23.2</i> | si:ch211-216l23.2                                                                     | 2.47 | 0.95 | 2.22  |
| <i>herc3</i>             | HECT and RLD domain containing E3 ubiquitin protein ligase 3                          | 2.47 | 1.16 | 2.36  |
| <i>zdhhc9</i>            | zinc finger, DHHC-type containing 9                                                   | 2.46 | 0.96 | 2.39  |
| <i>trmt44</i>            | tRNA methyltransferase 44 homolog                                                     | 2.46 | 0.84 | 2.03  |
| <i>mertka</i>            | c-mer proto-oncogene tyrosine kinase a                                                | 2.45 | 1.13 | 2.89  |
| <i>kcng4b</i>            | potassium voltage-gated channel, subfamily G, member 4b                               | 2.44 | 4.31 | 23.59 |
| <i>wdtc1</i>             | WD and tetratricopeptide repeats 1                                                    | 2.43 | 0.69 | 1.67  |
| <i>uacaa</i>             | uveal autoantigen with coiled-coil domains and ankyrin repeats a                      | 2.43 | 1.61 | 3.10  |
| <i>tfpt</i>              | TCF3 (E2A) fusion partner                                                             | 2.43 | 1.07 | 1.96  |
| <i>efcab7</i>            | EF-hand calcium binding domain 7                                                      | 2.43 | 1.48 | 3.43  |
| <i>notch3</i>            | notch 3                                                                               | 2.42 | 1.16 | 2.22  |
| <i>si:dkey-24l11.2</i>   | si:dkey-24l11.2                                                                       | 2.41 | 0.85 | 1.92  |
| <i>zgc:153151</i>        | zgc:153151                                                                            | 2.41 | 0.90 | 2.17  |
| <i>bckdk</i>             | branched chain ketoacid dehydrogenase kinase                                          | 2.4  | 0.67 | 1.97  |
| <i>marveld2a</i>         | MARVEL domain containing 2a                                                           | 2.4  | 1.01 | 2.27  |
| <i>als2b</i>             | amyotrophic lateral sclerosis 2b (juvenile)                                           | 2.4  | 1.60 | 2.62  |
| <i>nelfcd</i>            | negative elongation factor complex member C/D                                         | 2.4  | 0.96 | 1.91  |
| <i>abcd4</i>             | ATP-binding cassette, sub-family D (ALD), member 4                                    | 2.39 | 0.98 | 1.99  |
| <i>pxna</i>              | paxillin a                                                                            | 2.37 | 1.65 | 2.97  |
| <i>ddx59</i>             | DEAD (Asp-Glu-Ala-Asp) box polypeptide 59                                             | 2.37 | 1.10 | 2.46  |
| <i>fbxo3</i>             | F-box protein 3                                                                       | 2.37 | 1.08 | 2.64  |
| <i>si:dkey-240n22.3</i>  | si:dkey-240n22.3                                                                      | 2.36 | 1.98 | 3.46  |
| <i>creb3l3l</i>          | cAMP responsive element binding protein 3-like 3 like                                 | 2.35 | 0.71 | 1.62  |
| <i>fbxl6</i>             | F-box and leucine-rich repeat protein 6                                               | 2.35 | 1.36 | 3.61  |
| <i>arhgap27</i>          | Rho GTPase activating protein 27                                                      | 2.33 | 1.36 | 2.23  |
| <i>man2c1</i>            | mannosidase, alpha, class 2C, member 1                                                | 2.33 | 0.83 | 1.72  |
| <i>si:ch73-138n13.1</i>  | si:ch73-138n13.1                                                                      | 2.33 | 1.14 | 2.85  |
| <i>CU207301.3</i>        |                                                                                       | 2.33 | 1.07 | 1.91  |
| <i>krit1</i>             | KRIT1, ankyrin repeat containing                                                      | 2.32 | 1.33 | 2.51  |
| <i>CLIP4</i>             | si:dkeyp-47f9.4                                                                       | 2.31 | 1.31 | 2.53  |
| <i>CU856539.2</i>        |                                                                                       | 2.29 | 1.22 | 2.16  |
| <i>spast</i>             | spastin                                                                               | 2.28 | 1.22 | 3.53  |
| <i>smc6</i>              | structural maintenance of chromosomes 6                                               | 2.27 | 1.11 | 2.60  |
| <i>si:ch73-95l15.5</i>   | si:ch73-95l15.5                                                                       | 2.27 | 0.73 | 1.79  |
| <i>dger6</i>             | DiGeorge syndrome critical region gene 6                                              | 2.26 | 0.90 | 1.99  |
| <i>tspear</i>            | thrombospondin-type laminin G domain and EAR repeats a                                | 2.26 | 1.92 | 4.69  |
| <i>tnrc6c1</i>           | trinucleotide repeat containing 6C1                                                   | 2.26 | 1.02 | 3.43  |
| <i>mfsd4b</i>            | major facilitator superfamily domain containing 4B                                    | 2.25 | 0.85 | 1.93  |
| <i>wdsub1</i>            | WD repeat, sterile alpha motif and U-box domain containing 1                          | 2.25 | 0.82 | 1.84  |



|                         |                                                                    |      |      |      |
|-------------------------|--------------------------------------------------------------------|------|------|------|
| <i>recql5</i>           | RecQ helicase-like 5                                               | 2.25 | 0.92 | 1.67 |
| <i>ehmt1a</i>           | euchromatic histone-lysine N-methyltransferase 1a                  | 2.25 | 1.13 | 2.50 |
| <i>si:dkey-72117.5</i>  | si:dkey-72117.5                                                    | 2.24 | 1.51 | 2.06 |
| <i>tmem131l</i>         | transmembrane 131 like                                             | 2.24 | 0.99 | 1.89 |
| <i>zgc:158366</i>       | zgc:158366                                                         | 2.23 | 0.74 | 1.55 |
| <i>sirt6</i>            | sirtuin 6                                                          | 2.22 | 1.05 | 2.33 |
| <i>ncoa3</i>            | nuclear receptor coactivator 3                                     | 2.21 | 0.88 | 2.03 |
| <i>kdm4b</i>            | lysine (K)-specific demethylase 4B                                 | 2.2  | 0.80 | 1.93 |
| <i>zgc:173581</i>       | zgc:173581                                                         | 2.19 | 1.01 | 2.00 |
| <i>rfx1b</i>            | regulatory factor X, 1b (influences HLA class II expression)       | 2.19 | 1.13 | 2.17 |
| <i>BX005416.1</i>       |                                                                    | 2.19 | 1.08 | 2.73 |
| <i>slain2</i>           | SLAIN motif family, member 2                                       | 2.19 | 1.50 | 2.81 |
| <i>phf2</i>             | PHD finger protein 2                                               | 2.19 | 1.18 | 2.00 |
| <i>kif3a</i>            | kinesin family member 3A                                           | 2.18 | 1.13 | 2.25 |
| <i>arhgef1b</i>         | Rho guanine nucleotide exchange factor (GEF) 1b                    | 2.18 | 0.91 | 1.51 |
| <i>pcdh12</i>           | protocadherin 12                                                   | 2.18 | 1.47 | 3.63 |
| <i>CABZ01021435.1</i>   |                                                                    | 2.18 | 1.32 | 2.89 |
| <i>capn7</i>            | calpain 7                                                          | 2.18 | 0.75 | 1.71 |
| <i>sumf1</i>            | sulfatase modifying factor 1                                       | 2.17 | 0.93 | 1.61 |
| <i>si:dkey-159n16.2</i> | si:dkey-159n16.2                                                   | 2.17 | 2.01 | 3.20 |
| <i>arhgap27l</i>        | Rho GTPase activating protein 27, like                             | 2.16 | 1.35 | 3.58 |
| <i>ep300b</i>           | E1A binding protein p300 b                                         | 2.16 | 1.34 | 3.34 |
| <i>ap4e1</i>            | adaptor-related protein complex 4, epsilon 1 subunit               | 2.16 | 0.99 | 2.04 |
| <i>zgc:123105</i>       | zgc:123105                                                         | 2.16 | 0.90 | 1.42 |
| <i>ncoa1</i>            | nuclear receptor coactivator 1                                     | 2.16 | 1.40 | 3.07 |
| <i>calcocola</i>        | calcium binding and coiled-coil domain 1a                          | 2.15 | 1.28 | 3.16 |
| <i>rabgap1</i>          | RAB GTPase activating protein 1                                    | 2.15 | 1.63 | 2.66 |
| <i>nav2a</i>            | neuron navigator 2a                                                | 2.14 | 1.62 | 6.96 |
| <i>dbpa</i>             | D site albumin promoter binding protein a                          | 2.14 | 0.95 | 2.11 |
| <i>ift172</i>           | intraflagellar transport 172                                       | 2.14 | 1.19 | 2.04 |
| <i>si:dkey-165a24.9</i> | si:dkey-165a24.9                                                   | 2.14 | 1.38 | 2.48 |
| <i>ptpn2a</i>           | protein tyrosine phosphatase, non-receptor type 2, a               | 2.13 | 0.78 | 1.77 |
| <i>CR388364.2</i>       |                                                                    | 2.13 | 2.13 | 4.82 |
| <i>nt5dc2</i>           | 5'-nucleotidase domain containing 2                                | 2.13 | 0.77 | 1.57 |
| <i>tead1a</i>           | TEA domain family member 1a                                        | 2.12 | 1.44 | 3.53 |
| <i>trpm6</i>            | transient receptor potential cation channel, subfamily M, member 6 | 2.12 | 1.74 | 2.45 |
| <i>pld1a</i>            | phospholipase D1a                                                  | 2.12 | 0.74 | 1.79 |
| <i>trpm2</i>            | transient receptor potential cation channel, subfamily M, member 2 | 2.12 | 1.91 | 3.27 |
| <i>si:dkey-240n22.6</i> | si:dkey-240n22.6                                                   | 2.12 | 1.00 | 2.04 |
| <i>rnf20</i>            | ring finger protein 20, E3 ubiquitin protein ligase                | 2.12 | 1.00 | 2.11 |
| <i>cetn4</i>            | centrin 4                                                          | 2.11 | 0.92 | 1.80 |
| <i>tmem120a</i>         | transmembrane protein 120A                                         | 2.11 | 1.16 | 2.19 |
| <i>mgea5</i>            | meningioma expressed antigen 5 (hyaluronidase)                     | 2.1  | 0.97 | 2.73 |
| <i>brdt</i>             | bromodomain, testis-specific                                       | 2.1  | 1.85 | 3.05 |
| <i>usp2a</i>            | ubiquitin specific peptidase 2a                                    | 2.1  | 1.17 | 2.60 |
| <i>mtmr8</i>            | myotubularin related protein 8                                     | 2.09 | 1.36 | 2.33 |
| <i>sh3gl3a</i>          | SH3-domain GRB2-like 3a                                            | 2.08 | 0.97 | 3.71 |
| <i>qser1</i>            | glutamine and serine rich 1                                        | 2.08 | 1.14 | 2.41 |

|                          |                                                                                         |      |      |      |
|--------------------------|-----------------------------------------------------------------------------------------|------|------|------|
| <i>clk4a</i>             | CDC-like kinase 4a                                                                      | 2.07 | 1.78 | 3.07 |
| <i>CR759794.1</i>        |                                                                                         | 2.07 | 1.17 | 2.58 |
| <i>als2a</i>             | amyotrophic lateral sclerosis 2a (juvenile)                                             | 2.07 | 1.28 | 2.03 |
| <i>lims1</i>             | LIM and senescent cell antigen-like domains 1                                           | 2.06 | 0.87 | 2.04 |
| <i>rb1cc1</i>            | RB1-inducible coiled-coil 1                                                             | 2.03 | 0.67 | 1.45 |
| <i>ppp2r3c</i>           | protein phosphatase 2, regulatory subunit B", gamma                                     | 2.03 | 0.86 | 1.47 |
| <i>gpatch11</i>          | G patch domain containing 11                                                            | 2.03 | 0.74 | 1.41 |
| <i>kdm4c</i>             | lysine (K)-specific demethylase 4C                                                      | 2.03 | 0.98 | 1.83 |
| <i>smchd1</i>            | structural maintenance of chromosomes flexible hinge domain containing 1                | 2.02 | 0.78 | 1.56 |
| <i>epg5</i>              | ectopic P-granules autophagy protein 5 homolog (C. elegans)                             | 2.01 | 1.30 | 2.31 |
| <i>chd11</i>             | chromodomain helicase DNA binding protein 1-like                                        | 2    | 1.15 | 1.96 |
| <i>prkag2b</i>           | protein kinase, AMP-activated, gamma 2 non-catalytic subunit b                          | 1.99 | 0.82 | 2.03 |
| <i>tjp2a</i>             | tight junction protein 2a (zona occludens 2)                                            | 1.98 | 0.90 | 1.99 |
| <i>chfr</i>              | checkpoint with forkhead and ring finger domains, E3 ubiquitin protein ligase           | 1.97 | 0.93 | 1.58 |
| <i>appl1</i>             | adaptor protein, phosphotyrosine interaction, PH domain and leucine zipper containing 1 | 1.97 | 0.84 | 1.88 |
| <i>nhs11b</i>            | NHS-like 1b                                                                             | 1.97 | 1.48 | 2.73 |
| <i>zgc:153012</i>        | zgc:153012                                                                              | 1.96 | 0.88 | 2.04 |
| <i>si:dkey-262g12.14</i> | si:dkey-262g12.14                                                                       | 1.95 | 1.40 | 2.35 |
| <i>actb2</i>             | actin, beta 2                                                                           | 1.95 | 0.83 | 1.64 |
| <i>nr1h3</i>             | nuclear receptor subfamily 1, group H, member 3                                         | 1.94 | 0.78 | 1.71 |
| <i>kmt2e</i>             | lysine (K)-specific methyltransferase 2E                                                | 1.94 | 1.24 | 2.57 |
| <i>zgc:152774</i>        | zgc:152774                                                                              | 1.93 | 1.03 | 1.87 |
| <i>shc2</i>              | SHC (Src homology 2 domain containing) transforming protein 2                           | 1.93 | 1.07 | 2.45 |
| <i>def6c</i>             | differentially expressed in FDCP 6c homolog                                             | 1.92 | 0.85 | 2.38 |
| <i>mkrn1</i>             | makorin, ring finger protein, 1                                                         | 1.92 | 1.20 | 2.71 |
| <i>pak2a</i>             | p21 protein (Cdc42/Rac)-activated kinase 2a                                             | 1.92 | 0.88 | 1.66 |
| <i>taf3</i>              | TAF3 RNA polymerase II, TATA box binding protein (TBP)-associated facto                 | 1.92 | 0.88 | 1.78 |
| <i>raf1a</i>             | Raf-1 proto-oncogene, serine/threonine kinase a                                         | 1.91 | 1.04 | 1.82 |
| <i>selenoo1</i>          | selenoprotein O1                                                                        | 1.91 | 1.05 | 1.96 |
| <i>lnx2b</i>             | ligand of numb-protein X 2b                                                             | 1.89 | 1.37 | 2.08 |
| <i>mcf2la</i>            | mcf.2 cell line derived transforming sequence-like a                                    | 1.89 | 0.96 | 1.68 |
| <i>cyl1d1</i>            | cylindromatosis (turban tumor syndrome), like                                           | 1.89 | 0.78 | 1.46 |
| <i>ptpn13</i>            | protein tyrosine phosphatase, non-receptor type 13                                      | 1.89 | 1.38 | 2.46 |
| <i>rbm18</i>             | RNA binding motif protein 18                                                            | 1.89 | 0.88 | 1.84 |
| <i>alkbh3</i>            | alkB homolog 3, alpha-ketoglutarate-dependent dioxygenase                               | 1.88 | 1.42 | 2.60 |
| <i>gnpnat1</i>           | glucosamine-phosphate N-acetyltransferase 1                                             | 1.88 | 1.15 | 2.79 |
| <i>ldb2a</i>             | LIM domain binding 2a                                                                   | 1.88 | 1.10 | 1.99 |
| <i>CZQB01141835.2</i>    |                                                                                         | 1.88 | 1.10 | 2.33 |
| <i>rab40b</i>            | RAB40B, member RAS oncogene family                                                      | 1.87 | 0.79 | 1.77 |
| <i>dffb</i>              | DNA fragmentation factor, beta polypeptide (caspase-activated DNase)                    | 1.87 | 0.97 | 1.99 |
| <i>dyrk1b</i>            | dual-specificity tyrosine-(Y)-phosphorylation regulated kinase 1B                       | 1.87 | 1.05 | 2.36 |
| <i>per2</i>              | period circadian clock 2                                                                | 1.85 | 1.09 | 2.30 |
| <i>gtf2a11</i>           | general transcription factor IIA, 1-like                                                | 1.85 | 1.02 | 1.73 |
| <i>SLC35G1</i>           | si:ch211-197g18.2                                                                       | 1.85 | 1.04 | 1.79 |
| <i>wdr33</i>             | WD repeat domain 33                                                                     | 1.84 | 1.19 | 2.06 |
| <i>si:ch211-261p9.4</i>  | si:ch211-261p9.4                                                                        | 1.84 | 0.84 | 1.53 |
| <i>pkp3b</i>             | plakophilin 3b                                                                          | 1.84 | 0.90 | 1.85 |

|                          |                                                                          |      |      |      |
|--------------------------|--------------------------------------------------------------------------|------|------|------|
| <i>usp48</i>             | ubiquitin specific peptidase 48                                          | 1.84 | 1.03 | 1.78 |
| <i>znf384l</i>           | zinc finger protein 384 like                                             | 1.84 | 1.24 | 2.20 |
| <i>fpgs</i>              | folylpolyglutamate synthase                                              | 1.84 | 1.06 | 1.56 |
| <i>ift52</i>             | intraflagellar transport 52 homolog (Chlamydomonas)                      | 1.83 | 1.10 | 1.88 |
| <i>ormdl1</i>            | ORMDL sphingolipid biosynthesis regulator 1                              | 1.83 | 1.17 | 2.31 |
| <i>arhgef11</i>          | Rho guanine nucleotide exchange factor (GEF) 11                          | 1.83 | 1.32 | 2.03 |
| <i>si:ch211-213a13.5</i> | si:ch211-213a13.5                                                        | 1.83 | 2.08 | 2.69 |
| <i>safb</i>              | scaffold attachment factor B                                             | 1.82 | 1.15 | 1.74 |
| <i>znf451</i>            | zinc finger protein 451                                                  | 1.82 | 0.87 | 1.53 |
| <i>pnp1a7a</i>           | patatin-like phospholipase domain containing 7a                          | 1.81 | 0.99 | 1.66 |
| <i>rreb1b</i>            | ras responsive element binding protein 1b                                | 1.81 | 1.10 | 1.92 |
| <i>uhmk1</i>             | U2AF homology motif (UHM) kinase 1                                       | 1.8  | 1.69 | 2.38 |
| <i>znf438</i>            | zinc finger protein 438                                                  | 1.8  | 1.94 | 3.36 |
| <i>mbtps2</i>            | membrane-bound transcription factor peptidase, site 2                    | 1.79 | 0.96 | 1.79 |
| <i>wdr45</i>             | WD repeat domain 45                                                      | 1.79 | 0.97 | 1.42 |
| <i>cnot6a</i>            | CCR4-NOT transcription complex, subunit 6a                               | 1.79 | 1.08 | 2.00 |
| <i>shroom2a</i>          | shroom family member 2a                                                  | 1.79 | 1.37 | 3.14 |
| <i>mtmr14</i>            | myotubularin related protein 14                                          | 1.79 | 0.84 | 1.52 |
| <i>ppp1r12c</i>          | protein phosphatase 1, regulatory subunit 12C                            | 1.78 | 1.37 | 1.93 |
| <i>mtmr9</i>             | myotubularin related protein 9                                           | 1.77 | 0.99 | 1.51 |
| <i>cep290</i>            | centrosomal protein 290                                                  | 1.77 | 1.35 | 2.22 |
| <i>wdr41</i>             | WD repeat domain 41                                                      | 1.77 | 1.43 | 2.04 |
| <i>pi4k2b</i>            | phosphatidylinositol 4-kinase type 2 beta                                | 1.75 | 0.98 | 1.65 |
| <i>dopey1</i>            | dopey family member 1                                                    | 1.75 | 1.19 | 2.30 |
| <i>wipf2a</i>            | WAS/WASL interacting protein family, member 2a                           | 1.75 | 0.93 | 1.66 |
| <i>pank2</i>             | pantothenate kinase 2                                                    | 1.74 | 1.22 | 1.77 |
| <i>ankrd12</i>           | ankyrin repeat domain 12                                                 | 1.74 | 1.25 | 2.06 |
| <i>tab1</i>              | TGF-beta activated kinase 1/MAP3K7 binding protein 1                     | 1.74 | 0.96 | 1.53 |
| <i>abca3b</i>            | ATP-binding cassette, sub-family A (ABC1), member 3b                     | 1.73 | 0.98 | 1.69 |
| <i>spg11</i>             | spastic paraplegia 11                                                    | 1.73 | 1.16 | 1.85 |
| <i>cdc14b</i>            | cell division cycle 14B                                                  | 1.73 | 1.68 | 2.48 |
| <i>si:dkey-97a13.6</i>   | si:dkey-97a13.6                                                          | 1.72 | 1.04 | 2.07 |
| <i>carf</i>              | calcium responsive transcription factor                                  | 1.72 | 1.49 | 1.96 |
| <i>ssbp4</i>             | single stranded DNA binding protein 4                                    | 1.71 | 1.49 | 3.25 |
| <i>si:dkey-28a3.2</i>    | si:dkey-28a3.2                                                           | 1.7  | 0.99 | 1.73 |
| <i>si:ch211-230g15.5</i> | si:ch211-230g15.5                                                        | 1.69 | 1.27 | 2.27 |
| <i>malt3</i>             | MALT paracaspase 3                                                       | 1.69 | 1.04 | 2.50 |
| <i>im:7160594</i>        | im:7160594                                                               | 1.69 | 0.84 | 1.54 |
| <i>fmnl3</i>             | formin-like 3                                                            | 1.68 | 1.19 | 2.03 |
| <i>pi4kb</i>             | phosphatidylinositol 4-kinase, catalytic, beta                           | 1.66 | 0.95 | 1.80 |
| <i>stag1a</i>            | stromal antigen 1a                                                       | 1.66 | 1.68 | 2.41 |
| <i>csnk1db</i>           | casein kinase 1, delta b                                                 | 1.65 | 1.27 | 1.82 |
| <i>dtnbp1a</i>           | dystrobrevin binding protein 1a                                          | 1.65 | 1.00 | 1.47 |
| <i>taf2</i>              | TAF2 RNA polymerase II, TATA box binding protein (TBP)-associated factor | 1.65 | 1.06 | 1.57 |
| <i>ncoa5</i>             | nuclear receptor coactivator 5                                           | 1.65 | 1.05 | 1.83 |

|                         |                                                                                                       |      |      |      |
|-------------------------|-------------------------------------------------------------------------------------------------------|------|------|------|
| <i>usp25</i>            | ubiquitin specific peptidase 25                                                                       | 1.65 | 1.16 | 1.69 |
| <i>foxp1b</i>           | forkhead box P1b                                                                                      | 1.64 | 1.25 | 1.93 |
| <i>nrbp2b</i>           | nuclear receptor binding protein 2b                                                                   | 1.64 | 1.49 | 2.23 |
| <i>ypel5</i>            | yippee-like 5                                                                                         | 1.63 | 1.14 | 1.42 |
| <i>ftr79</i>            | finTRIM family, member 79                                                                             | 1.62 | 1.41 | 2.33 |
| <i>gpc4</i>             | glypican 4                                                                                            | 1.62 | 1.07 | 1.74 |
| <i>si:dkey-156n14.5</i> | si:dkey-156n14.5                                                                                      | 1.62 | 1.26 | 1.95 |
| <i>gatsl2</i>           | GATS protein-like 2                                                                                   | 1.62 | 1.34 | 2.06 |
| <i>phrf1</i>            | PHD and ring finger domains 1                                                                         | 1.62 | 1.03 | 1.88 |
| <i>trafd1</i>           | TRAF-type zinc finger domain containing 1                                                             | 1.61 | 0.99 | 1.84 |
| <i>ctdsp1</i>           | CTD (carboxy-terminal domain, RNA polymerase II, polypeptide A) small phosphatase 1                   | 1.61 | 0.94 | 1.51 |
| <i>atmin</i>            | ATM interactor                                                                                        | 1.61 | 1.46 | 2.33 |
| <i>gnal</i>             | guanine nucleotide binding protein (G protein), alpha activating activity polypeptide, olfactory type | 1.6  | 1.51 | 2.38 |
| <i>tjp1a</i>            | tight junction protein 1a                                                                             | 1.6  | 1.25 | 2.16 |
| <i>si:dkey-16p6.1</i>   | si:dkey-16p6.1                                                                                        | 1.6  | 1.26 | 1.97 |
| <i>wdr26b</i>           | WD repeat domain 26b                                                                                  | 1.6  | 0.81 | 1.54 |
| <i>rbm4.2</i>           | RNA binding motif protein 4.2                                                                         | 1.58 | 1.06 | 1.55 |
| <i>golga4</i>           | golgin A4                                                                                             | 1.58 | 1.01 | 1.47 |
| <i>rest</i>             | RE1-silencing transcription factor                                                                    | 1.57 | 1.98 | 3.29 |
| <i>yy1a</i>             | YY1 transcription factor a                                                                            | 1.57 | 1.01 | 1.52 |
| <i>slkb</i>             | STE20-like kinase b                                                                                   | 1.57 | 1.55 | 2.30 |
| <i>FBXO48</i>           | si:dkey-202b17.4                                                                                      | 1.56 | 1.12 | 1.40 |
| <i>grhpra</i>           | glyoxylate reductase/hydroxypyruvate reductase a                                                      | 1.56 | 1.45 | 2.00 |
| <i>traf2b</i>           | Tnf receptor-associated factor 2b                                                                     | 1.56 | 1.13 | 1.64 |
| <i>si:ch73-1a9.3</i>    | si:ch73-1a9.3                                                                                         | 1.54 | 1.19 | 1.60 |
| <i>brd9</i>             | bromodomain containing 9                                                                              | 1.53 | 1.01 | 1.44 |
| <i>inpp5ka</i>          | inositol polyphosphate-5-phosphatase Ka                                                               | 1.5  | 0.97 | 1.38 |
| <i>add3a</i>            | adducin 3 (gamma) a                                                                                   | 1.5  | 1.15 | 1.57 |
| <i>hook2</i>            | hook microtubule-tethering protein 2                                                                  | 1.49 | 0.99 | 1.36 |
| <i>per3</i>             | period circadian clock 3                                                                              | 1.48 | 1.30 | 1.73 |
| <i>tial1</i>            | TIA1 cytotoxic granule-associated RNA binding protein-like 1                                          | 1.47 | 1.43 | 1.88 |
| <i>hnrnpm</i>           | heterogeneous nuclear ribonucleoprotein M                                                             | 1.47 | 1.07 | 1.55 |
| <i>usp8</i>             | ubiquitin specific peptidase 8                                                                        | 1.45 | 0.89 | 1.38 |
| <i>dusp16</i>           | dual specificity phosphatase 16                                                                       | 1.43 | 1.08 | 1.40 |
| <i>optn</i>             | optineurin                                                                                            | 1.4  | 0.46 | 0.62 |
| <i>psmc1a</i>           | proteasome 26S subunit, ATPase 1a                                                                     | 1.36 | 0.53 | 0.67 |
| <i>arid4a</i>           | AT rich interactive domain 4A (RBP1-like)                                                             | 1.36 | 1.20 | 1.52 |
| <i>cdh1</i>             | cadherin 1, type 1, E-cadherin (epithelial)                                                           | 1.36 | 1.12 | 1.51 |
| <i>tfb2m</i>            | transcription factor B2, mitochondrial                                                                | 0.76 | 1.00 | 0.70 |
| <i>upf1</i>             | upf1 regulator of nonsense transcripts homolog (yeast)                                                | 0.72 | 0.92 | 0.70 |
| <i>tomm22</i>           | translocase of outer mitochondrial membrane 22 homolog (yeast)                                        | 0.72 | 0.88 | 0.60 |
| <i>uba3</i>             | ubiquitin-like modifier activating enzyme 3                                                           | 0.71 | 0.82 | 0.55 |
| <i>rbm25b</i>           | RNA binding motif protein 25b                                                                         | 0.71 | 0.95 | 0.74 |
| <i>srsf5a</i>           | serine/arginine-rich splicing factor 5a                                                               | 0.7  | 0.83 | 0.63 |
| <i>sestd1</i>           | SEC14 and spectrin domains 1                                                                          | 0.7  | 0.73 | 0.53 |
| <i>mef2cb</i>           | myocyte enhancer factor 2cb                                                                           | 0.68 | 0.87 | 0.69 |

|                         |                                                                          |      |      |      |
|-------------------------|--------------------------------------------------------------------------|------|------|------|
| <i>azin1a</i>           | antizyme inhibitor 1a                                                    | 0.68 | 0.86 | 0.57 |
| <i>oaz1b</i>            | ornithine decarboxylase antizyme 1b                                      | 0.68 | 0.80 | 0.59 |
| <i>hmgb3b</i>           | high mobility group box 3b                                               | 0.67 | 0.98 | 0.64 |
| <i>si:dkey-286j15.1</i> | si:dkey-286j15.1                                                         | 0.65 | 0.98 | 0.63 |
| <i>lcn15</i>            | lipocalin 15                                                             | 0.65 | 1.13 | 0.70 |
| <i>mapkapk2a</i>        | mitogen-activated protein kinase-activated protein kinase 2a             | 0.65 | 0.95 | 0.54 |
| <i>tomm70a</i>          | translocase of outer mitochondrial membrane 70 homolog A (S. cerevisiae) | 0.65 | 0.94 | 0.59 |
| <i>cux2b</i>            | cut-like homeobox 2b                                                     | 0.64 | 0.81 | 0.48 |
| <i>smim12</i>           | small integral membrane protein 12                                       | 0.63 | 0.75 | 0.48 |
| <i>rab35b</i>           | RAB35, member RAS oncogene family b                                      | 0.63 | 0.94 | 0.60 |
| <i>adck5</i>            | aarF domain containing kinase 5                                          | 0.62 | 0.57 | 0.34 |
| <i>nde1</i>             | nudE neurodevelopment protein 1                                          | 0.62 | 0.96 | 0.54 |
| <i>rap1ab</i>           | RAP1A, member of RAS oncogene family b                                   | 0.62 | 0.94 | 0.55 |
| <i>ddx61</i>            | DEAD (Asp-Glu-Ala-Asp) box helicase 61                                   | 0.62 | 0.90 | 0.55 |
| <i>znf574</i>           | zinc finger protein 574                                                  | 0.62 | 0.76 | 0.55 |
| <i>kat2a</i>            | K(lysine) acetyltransferase 2A                                           | 0.61 | 0.82 | 0.55 |
| <i>ddx19</i>            | DEAD/H (Asp-Glu-Ala-Asp/His) box polypeptide 19 (DBP5 homolog, yeast)    | 0.61 | 0.96 | 0.53 |
| <i>dolpp1</i>           | dolichyldiphosphatase 1                                                  | 0.61 | 0.91 | 0.61 |
| <i>si:ch211-210c8.7</i> | si:ch211-210c8.7                                                         | 0.61 | 1.16 | 0.65 |
| <i>mt-nd6</i>           | NADH dehydrogenase 6, mitochondrial                                      | 0.61 | 1.11 | 0.63 |
| <i>timm10b</i>          | translocase of inner mitochondrial membrane 10 homolog B (yeast)         | 0.6  | 1.06 | 0.64 |
| <i>kdm6al</i>           | lysine (K)-specific demethylase 6A, like                                 | 0.6  | 0.92 | 0.66 |
| <i>mapre1b</i>          | microtubule-associated protein, RP/EB family, member 1b                  | 0.6  | 0.92 | 0.52 |
| <i>lsm1</i>             | LSM1, U6 small nuclear RNA associated                                    | 0.6  | 1.13 | 0.66 |
| <i>slc51a</i>           | solute carrier family 51, alpha subunit                                  | 0.6  | 0.96 | 0.53 |
| <i>pgam1a</i>           | phosphoglycerate mutase 1a                                               | 0.59 | 1.03 | 0.62 |
| <i>si:ch211-235e9.8</i> | si:ch211-235e9.8                                                         | 0.59 | 0.82 | 0.45 |
| <i>ppa1b</i>            | pyrophosphatase (inorganic) 1b                                           | 0.59 | 1.00 | 0.58 |
| <i>pinx1</i>            | PIN2/TERF1 interacting, telomerase inhibitor 1                           | 0.58 | 0.95 | 0.52 |
| <i>fam136a</i>          | family with sequence similarity 136, member A                            | 0.58 | 0.73 | 0.38 |
| <i>phospho2</i>         | phosphatase, orphan 2                                                    | 0.58 | 1.05 | 0.59 |
| <i>mars</i>             | methionyl-tRNA synthetase                                                | 0.57 | 0.86 | 0.49 |
| <i>hmbsa</i>            | hydroxymethylbilane synthase a                                           | 0.56 | 0.95 | 0.48 |
| <i>si:dkey-121a9.3</i>  | si:dkey-121a9.3                                                          | 0.56 | 0.92 | 0.49 |
| <i>qars</i>             | glutaminyl-tRNA synthetase                                               | 0.56 | 0.82 | 0.46 |
| <i>igdcc4</i>           | immunoglobulin superfamily, DCC subclass, member 4                       | 0.56 | 0.67 | 0.46 |
| <i>ptpn11b</i>          | protein tyrosine phosphatase, non-receptor type 11, b                    | 0.56 | 0.77 | 0.51 |
| <i>higd1a</i>           | HIG1 hypoxia inducible domain family, member 1A                          | 0.56 | 1.04 | 0.56 |
| <i>si:ch73-21k16.5</i>  | si:ch73-21k16.5                                                          | 0.56 | 1.06 | 0.54 |
| <i>elavl1a</i>          | ELAV like RNA binding protein 1a                                         | 0.55 | 1.06 | 0.55 |
| <i>ppih</i>             | peptidylprolyl isomerase H (cyclophilin H)                               | 0.54 | 0.86 | 0.45 |
| <i>tor3a</i>            | torsin family 3, member A                                                | 0.54 | 0.93 | 0.55 |
| <i>hprt1</i>            | hypoxanthine phosphoribosyltransferase 1                                 | 0.54 | 0.90 | 0.48 |
| <i>sigmar1</i>          | sigma non-opioid intracellular receptor 1                                | 0.54 | 0.94 | 0.50 |
| <i>cers2b</i>           | ceramide synthase 2b                                                     | 0.54 | 0.79 | 0.40 |
| <i>si:ch211-51e12.7</i> | si:ch211-51e12.7                                                         | 0.53 | 1.22 | 0.69 |
| <i>nsdhl</i>            | NAD(P) dependent steroid dehydrogenase-like                              | 0.53 | 1.03 | 0.52 |
| <i>btaf1</i>            | BTA1 RNA polymerase II, B-TFIID transcription factor-associated          | 0.53 | 1.25 | 0.70 |



|                          |                                                                                                                   |      |      |      |
|--------------------------|-------------------------------------------------------------------------------------------------------------------|------|------|------|
| <i>lgalsla</i>           | lectin, galactoside-binding-like a                                                                                | 0.53 | 1.06 | 0.53 |
| <i>foxo3a</i>            | forkhead box O3A                                                                                                  | 0.53 | 0.65 | 0.40 |
| <i>CDPF1</i>             | si:ch211-239e6.4                                                                                                  | 0.52 | 1.06 | 0.49 |
| <i>upp1</i>              | uridine phosphorylase 1                                                                                           | 0.52 | 0.76 | 0.53 |
| <i>nt5dc3</i>            | 5'-nucleotidase domain containing 3                                                                               | 0.52 | 0.94 | 0.51 |
| <i>pus10</i>             | pseudouridylate synthase 10                                                                                       | 0.52 | 0.96 | 0.50 |
| <i>atp13a3</i>           | ATPase 13A3                                                                                                       | 0.51 | 0.47 | 0.23 |
| <i>ccnt2b</i>            | cyclin T2b                                                                                                        | 0.5  | 0.97 | 0.48 |
| <i>slc19a2</i>           | solute carrier family 19 (thiamine transporter), member 2                                                         | 0.5  | 0.97 | 0.40 |
| <i>srd5a1</i>            | steroid-5-alpha-reductase, alpha polypeptide 1 (3-oxo-5 alpha-steroid delta 4-dehydrogenase alpha 1)              | 0.49 | 0.87 | 0.40 |
| <i>ABCF3</i>             | ATP binding cassette subfamily F member 3                                                                         | 0.49 | 0.75 | 0.38 |
| <i>znrd1</i>             | zinc ribbon domain containing 1                                                                                   | 0.49 | 0.87 | 0.47 |
| <i>elf4e1c</i>           | eukaryotic translation initiation factor 4E family member 1c                                                      | 0.49 | 1.01 | 0.48 |
| <i>cyb5b</i>             | cytochrome b5 type B                                                                                              | 0.49 | 1.06 | 0.40 |
| <i>cyb5r2</i>            | cytochrome b5 reductase 2                                                                                         | 0.48 | 0.86 | 0.38 |
| <i>grtp1a</i>            | growth hormone regulated TBC protein 1a                                                                           | 0.47 | 0.58 | 0.29 |
| <i>nudt3b</i>            | nudix (nucleoside diphosphate linked moiety X)-type motif 3b                                                      | 0.47 | 0.74 | 0.39 |
| <i>znf1007</i>           | zinc finger protein 1007                                                                                          | 0.47 | 0.93 | 0.55 |
| <i>sema4ba</i>           | sema domain, immunoglobulin domain (Ig), transmembrane domain (TM) and short cytoplasmic domain, (semaphorin) 4Ba | 0.47 | 0.75 | 0.33 |
| <i>CABZ01002690.1</i>    |                                                                                                                   | 0.46 | 0.74 | 0.37 |
| <i>xpo4</i>              | exportin 4                                                                                                        | 0.45 | 1.16 | 0.43 |
| <i>rin2</i>              | Ras and Rab interactor 2                                                                                          | 0.45 | 0.92 | 0.44 |
| <i>ptges3b</i>           | prostaglandin E synthase 3b (cytosolic)                                                                           | 0.44 | 1.07 | 0.43 |
| <i>myo10l3</i>           | myosin X-like 3                                                                                                   | 0.44 | 0.72 | 0.38 |
| <i>tim50</i>             | translocase of inner mitochondrial membrane 50 homolog (S. cerevisiae)                                            | 0.44 | 1.02 | 0.41 |
| <i>spag1a</i>            | sperm associated antigen 1a                                                                                       | 0.44 | 0.58 | 0.27 |
| <i>gpam</i>              | glycerol-3-phosphate acyltransferase, mitochondrial                                                               | 0.43 | 0.71 | 0.30 |
| <i>rpz2</i>              | rapunzel 2                                                                                                        | 0.43 | 1.11 | 0.49 |
| <i>asmt2</i>             | acetylserotonin O-methyltransferase 2                                                                             | 0.42 | 0.52 | 0.36 |
| <i>hs3st3b1b</i>         | heparan sulfate (glucosamine) 3-O-sulfotransferase 3B1b                                                           | 0.42 | 0.84 | 0.50 |
| <i>arhgef2</i>           | rho/rac guanine nucleotide exchange factor (GEF) 2                                                                | 0.4  | 0.87 | 0.28 |
| <i>pacs2</i>             | phosphofurin acidic cluster sorting protein 2                                                                     | 0.4  | 0.50 | 0.30 |
| <i>NC_002333.19</i>      |                                                                                                                   | 0.39 | 0.94 | 0.46 |
| <i>rbp7a</i>             | retinol binding protein 7a, cellular                                                                              | 0.39 | 0.54 | 0.18 |
| <i>frya</i>              | furry homolog a (Drosophila)                                                                                      | 0.38 | 0.49 | 0.20 |
| <i>aacs</i>              | acetoacetyl-CoA synthetase                                                                                        | 0.37 | 0.65 | 0.22 |
| <i>si:ch211-197l9.2</i>  | si:ch211-197l9.2                                                                                                  | 0.37 | 0.31 | 0.13 |
| <i>dhh</i>               | desert hedgehog                                                                                                   | 0.37 | 1.02 | 0.45 |
| <i>kirrel3l</i>          | kirre like nephrin family adhesion molecule 3, like                                                               | 0.36 | 1.27 | 0.37 |
| <i>calcr1b</i>           | calcitonin receptor-like b                                                                                        | 0.36 | 1.24 | 0.58 |
| <i>ptp4a3</i>            | protein tyrosine phosphatase type IVA, member 3                                                                   | 0.36 | 0.83 | 0.31 |
| <i>gtf3c2</i>            | general transcription factor IIIC, polypeptide 2, beta                                                            | 0.35 | 0.94 | 0.43 |
| <i>dcbl1</i>             | discoidin, CUB and LCCL domain containing 1                                                                       | 0.34 | 0.38 | 0.13 |
| <i>slc38a3a</i>          | solute carrier family 38, member 3a                                                                               | 0.34 | 0.99 | 0.36 |
| <i>idi1</i>              | isopentenyl-diphosphate delta isomerase 1                                                                         | 0.34 | 1.17 | 0.31 |
| <i>si:ch1073-296i8.2</i> | si:ch1073-296i8.2                                                                                                 | 0.33 | 0.83 | 0.15 |

|                       |                                                                                                                           |      |      |      |
|-----------------------|---------------------------------------------------------------------------------------------------------------------------|------|------|------|
| <i>CABZ01015475.1</i> |                                                                                                                           | 0.33 | 1.09 | 0.41 |
| <i>rbms2b</i>         | RNA binding motif, single stranded interacting protein 2b                                                                 | 0.27 | 1.69 | 0.41 |
| <i>gramd4a</i>        | GRAM domain containing 4a                                                                                                 | 0.27 | 1.49 | 0.40 |
| <i>NC_002333.2</i>    |                                                                                                                           | 0.27 | 0.38 | 0.13 |
| <i>ebp</i>            | emopamil binding protein (sterol isomerase)                                                                               | 0.26 | 1.12 | 0.22 |
| <i>fdft1</i>          | farnesyl-diphosphate farnesyltransferase 1                                                                                | 0.26 | 1.25 | 0.27 |
| <i>hsd17b7</i>        | hydroxysteroid (17-beta) dehydrogenase 7                                                                                  | 0.26 | 1.37 | 0.34 |
| <i>fgf13b</i>         | fibroblast growth factor 13b                                                                                              | 0.25 | 0.52 | 0.12 |
| <i>mvda</i>           | mevalonate (diphospho) decarboxylase a                                                                                    | 0.25 | 1.35 | 0.26 |
| <i>msmo1</i>          | methylsterol monooxygenase 1                                                                                              | 0.23 | 1.89 | 0.31 |
| <i>sqlea</i>          | squalene epoxidase a                                                                                                      | 0.18 | 1.88 | 0.16 |
| <i>bach2a</i>         | BTB and CNC homology 1, basic leucine zipper transcription factor 2a                                                      | 0.18 | 0.57 | 0.17 |
| <i>lss</i>            | lanosterol synthase (2,3-oxidosqualene-lanosterol cyclase)                                                                | 0.17 | 1.19 | 0.14 |
| <i>mvk</i>            | mevalonate kinase                                                                                                         | 0.16 | 1.81 | 0.28 |
| <i>hmgcs1</i>         | 3-hydroxy-3-methylglutaryl-CoA synthase 1 (soluble)                                                                       | 0.15 | 1.44 | 0.16 |
| <i>fdps</i>           | farnesyl diphosphate synthase (farnesyl pyrophosphate synthetase, dimethylallyltranstransferase, geranyltranstransferase) | 0.14 | 2.39 | 0.27 |
| <i>igsf9ba</i>        | immunoglobulin superfamily, member 9Ba                                                                                    | 0.12 | 1.71 | 0.33 |
| <i>rpp25a</i>         | ribonuclease P and MRP subunit p25, a                                                                                     | 0.1  | 1.97 | 0.12 |
| <i>zbtb16a</i>        | zinc finger and BTB domain containing 16a                                                                                 | 0.07 | 1.05 | 0.09 |

**Table S2. List of DEPs identified from LC-MS/MS**

| Gene                  | Product                                                              | Z+/A+ | A+/A- | Z+/Z- |
|-----------------------|----------------------------------------------------------------------|-------|-------|-------|
| Scgn                  | secretagogen, EF-hand calcium binding protein                        | 9.89  | 1.18  | 2.76  |
| Mgst2                 | microsomal glutathione S-transferase 2                               | 5.18  | 0.52  | 3.52  |
| GFP-T2A-AAT-transgene | GFP-T2A-AAT-transgene                                                | 4.63  | 1.02  | 5.59  |
| Sdsl                  | serine dehydratase-like                                              | 3.43  | 2.98  | 1.93  |
| Liph                  | lipase member H                                                      | 3.13  | 0.70  | 5.05  |
| Vmo1a                 | vitelline membrane outer layer 1 homolog a                           | 2.77  | 1.52  | 1.95  |
| Lrp1aa                | low density lipoprotein receptor-related protein 1Aa                 | 2.36  | 0.79  | 1.16  |
| Si:ch211-74f19.2      | si:ch211-74f19.2                                                     | 1.95  | 0.71  | 2.42  |
| Mpdu1b                | mannose-P-dolichol utilization defect 1b                             | 1.93  | 0.79  | 1.26  |
| Fuk                   | fucokinase                                                           | 1.65  | 0.86  | 1.09  |
| Caska                 | calcium/calmodulin-dependent serine protein kinase a                 | 1.64  | 0.79  | 1.52  |
| Psmg1                 | proteasome (prosome, macropain) assembly chaperone 1                 | 1.55  | 0.52  | 0.84  |
| Sccpdhb               | saccharopine dehydrogenase b                                         | 1.54  | 0.84  | 1.12  |
| Larp4aa               | La ribonucleoprotein domain family, member 4Aa                       | 1.52  | 0.47  | 0.73  |
| Mipep                 | mitochondrial intermediate peptidase                                 | 1.5   | 0.87  | 1.27  |
| Anxa11b               | annexin A11b                                                         | 1.48  | 0.99  | 1.64  |
| Sil1                  | SIL1 nucleotide exchange factor                                      | 1.45  | 0.48  | 0.86  |
| Rrbp1b                | ribosome binding protein 1b                                          | 1.43  | 0.23  | 0.55  |
| Farsa                 | phenylalanyl-tRNA synthetase, alpha subunit                          | 1.43  | 0.58  | 0.69  |
| Zgc:152945            | zgc:152945                                                           | 1.41  | 0.40  | 0.73  |
| Pcyt2                 | phosphate cytidyltransferase 2, ethanolamine                         | 1.4   | 0.53  | 0.76  |
| Apobb.2               | apolipoprotein Bb, tandem duplicate 2                                | 1.38  | 0.88  | 1.41  |
| Ipo7                  | importin 7                                                           | 1.36  | 0.71  | 0.71  |
| Setd1a                | SET domain containing 1A                                             | 1.33  | 0.47  | 0.73  |
| Erlec1                | endoplasmic reticulum lectin 1                                       | 1.32  | 0.63  | 0.71  |
| Dpm3                  | dolichyl-phosphate mannosyltransferase polypeptide 3                 | 1.31  | 0.58  | 0.46  |
| Larsa                 | leucyl-tRNA synthetase a                                             | 1.3   | 0.60  | 0.79  |
| Rock2a                | rho-associated, coiled-coil containing protein kinase 2a             | 1.29  | 0.85  | 1.43  |
| Memo1                 | mediator of cell motility 1                                          | 1.29  | 0.74  | 0.83  |
| Rab1ab                | RAB1A, member RAS oncogene family b                                  | 1.27  | 0.62  | 0.84  |
| Tmem177               | transmembrane protein 177                                            | 1.27  | 0.97  | 1.31  |
| Zgc:101540            | zgc:101540                                                           | 1.26  | 0.95  | 1.57  |
| C8b                   | complement component 8, beta polypeptide                             | 1.25  | 0.93  | 1.46  |
| Fam3a                 | family with sequence similarity 3, member A                          | 1.25  | 0.73  | 0.82  |
| Abraxas2b             | abraxas 2b, BRISC complex subunit                                    | 1.23  | 1.02  | 1.14  |
| Sec61b                | Sec61 translocon beta subunit                                        | 1.23  | 0.71  | 0.59  |
| Vcp                   | valosin containing protein                                           | 1.22  | 0.67  | 0.74  |
| Drg1                  | developmentally regulated GTP binding protein 1                      | 1.21  | 0.70  | 0.81  |
| Slc16a2               | solute carrier family 16 member 2                                    | 1.2   | 0.80  | 0.78  |
| Ufl1                  | UFM1-specific ligase 1                                               | 1.2   | 0.79  | 0.73  |
| Gspt1l                | G1 to S phase transition 1, like                                     | 1.19  | 0.70  | 0.76  |
| Rab1aa                | RAB1A, member RAS oncogene family a                                  | 1.19  | 0.70  | 0.85  |
| Psm2                  | proteasome subunit alpha 2                                           | 1.17  | 0.80  | 0.85  |
| Slc23a1               | solute carrier family 23 (ascorbic acid transporter), member 1       | 1.15  | 1.00  | 1.15  |
| Pafah1b1a             | platelet-activating factor acetylhydrolase 1b, regulatory subunit 1a | 1.13  | 0.81  | 0.87  |

|                    |                                                                     |      |      |      |
|--------------------|---------------------------------------------------------------------|------|------|------|
| Rab5c              | RAB5C, member RAS oncogene family                                   | 1.12 | 0.80 | 0.94 |
| Ufd1l              | ubiquitin recognition factor in ER associated degradation 1         | 1.11 | 0.86 | 0.82 |
| Psmc7              | proteasome 26S subunit, non-ATPase 7                                | 1.09 | 0.90 | 0.83 |
| Mest               | mesoderm specific transcript                                        | 0.9  | 1.06 | 0.93 |
| Tmed7              | transmembrane p24 trafficking protein 7                             | 0.87 | 0.93 | 0.93 |
| Cfl1               | cofilin 1                                                           | 0.86 | 1.03 | 0.88 |
| Erp44              | endoplasmic reticulum protein 44                                    | 0.84 | 0.95 | 0.85 |
| Srsf5b             | serine/arginine-rich splicing factor 5b                             | 0.82 | 1.15 | 0.85 |
| Enpp1              | ectonucleotide pyrophosphatase/phosphodiesterase 1                  | 0.82 | 1.55 | 1.58 |
| Pyroxd2            | pyridine nucleotide-disulphide oxidoreductase domain 2              | 0.82 | 1.05 | 0.90 |
| Slc12a4            | solute carrier family 12 (potassium/chloride transporter), member 4 | 0.81 | 1.06 | 0.79 |
| Im:7138535         | im:7138535                                                          | 0.8  | 1.15 | 0.83 |
| Dpy19l1            | dpy-19-like 1, like (H. sapiens)                                    | 0.8  | 1.73 | 1.21 |
| Cct2               | haperonin containing TCP1 complex subunit 2                         | 0.78 | 1.31 | 1.24 |
| Gale               | UDP-galactose-4-epimerase                                           | 0.76 | 1.23 | 0.81 |
| Epcam              | epithelial cell adhesion molecule                                   | 0.75 | 0.90 | 0.71 |
| Snrpd3l            | small nuclear ribonucleoprotein D3 polypeptide, like                | 0.74 | 0.93 | 0.61 |
| Aldh9a1a           | aldehyde dehydrogenase 9 family, member A1a                         | 0.71 | 1.22 | 0.95 |
| Rdh14b             | retinol dehydrogenase 14b                                           | 0.69 | 1.17 | 0.84 |
| Gpa33              | glycoprotein A33 (transmembrane)                                    | 0.68 | 1.04 | 0.52 |
| Mgc173689          | MGC: 173689                                                         | 0.63 | 0.93 | 0.78 |
| Coro1a             | coronin, actin binding protein, 1A                                  | 0.6  | 0.93 | 0.60 |
| Krt91              | keratin 91                                                          | 0.57 | 1.20 | 0.70 |
| Zgc:103586         | zgc:103586                                                          | 0.57 | 1.54 | 0.84 |
| Tcea3              | transcription elongation factor A (SII), 3                          | 0.53 | 0.97 | 0.49 |
| Ckmb               | creatine kinase, muscle b                                           | 0.48 | 1.09 | 0.46 |
| Nudt7              | nudix (nucleoside diphosphate linked moiety X)-type motif 7         | 0.46 | 0.78 | 0.37 |
| Zgc:174259         | zgc:174259                                                          | 0.38 | 0.87 | 0.45 |
| Dap1b              | death associated protein 1b                                         | 0.37 | 1.31 | 0.29 |
| Pla2g1b            | phospholipase A2, group IB (pancreas)                               | 0.36 | 3.65 | 0.15 |
| Pck1               | phosphoenolpyruvate carboxykinase 1 (soluble)                       | 0.35 | 0.72 | 0.18 |
| Si:ch1073-110a20.3 | si:ch1073-110a20.3                                                  | 0.28 | 1.51 | 0.21 |

**Table S3. GO enrichment from RNA-seq DEGs**

|    | Gene Ontology Term (GO term)                                                                               | Enrichment score |
|----|------------------------------------------------------------------------------------------------------------|------------------|
| 1  | Response To Purine-Containing Compound                                                                     | 34.711           |
| 2  | Isoprenoid Biosynthetic Process                                                                            | 30.819           |
| 3  | Cholesterol Biosynthetic Process                                                                           | 30.639           |
| 4  | Regulation Of Endosome Size                                                                                | 29.2             |
| 5  | Autophagy Of Host Cells Involved In Interaction With Symbiont                                              | 27.769           |
| 6  | Regulation Of Cholesterol Biosynthetic Process                                                             | 25.244           |
| 7  | Isopentenyl Diphosphate Biosynthetic Process, Mevalonate Pathway                                           | 19.467           |
| 8  | Positive Regulation Of Rac Protein Signal Transduction                                                     | 19.467           |
| 9  | Positive Regulation Of Transcription From Rna Polymerase Ii Promoter Involved In Unfolded Protein Response | 19.467           |
| 10 | Glycerol-3-Phosphate Metabolic Process                                                                     | 19.467           |
| 11 | Sterol Biosynthetic Process                                                                                | 16.686           |
| 12 | Positive Regulation Of Protein Homodimerization Activity                                                   | 15.427           |
| 13 | Positive Regulation Of Hydrogen Peroxide-Mediated Programmed Cell Death                                    | 14.6             |
| 14 | Negative Regulation Of Activation-Induced Cell Death Of T Cells                                            | 14.6             |
| 15 | Regulation Of Autophagy                                                                                    | 13.017           |
| 16 | Receptor Recycling                                                                                         | 12.622           |
| 17 | Regulation Of Androgen Receptor Signaling Pathway                                                          | 12.622           |
| 18 | Cellular Response To Nerve Growth Factor Stimulus                                                          | 12.24            |
| 19 | Protein Localization                                                                                       | 11.733           |
| 20 | Dolichyl Diphosphate Biosynthetic Process                                                                  | 11.68            |
| 21 | Positive Regulation Of Chromosome Segregation                                                              | 11.68            |
| 22 | Parkin-Mediated Stimulation Of Mitophagy In Response To Mitochondrial Depolarization                       | 11.68            |
| 23 | Regulation Of Establishment Of Protein Localization                                                        | 11.68            |
| 24 | Regulation Of Kinase Activity                                                                              | 11.68            |
| 25 | Internal Peptidyl-Lysine Acetylation                                                                       | 11.68            |
| 26 | Regulation Of Fatty Acid Metabolic Process                                                                 | 11.68            |
| 27 | Liver Development                                                                                          | 11.412           |
| 28 | Phosphatidylinositol Biosynthetic Process                                                                  | 11.124           |
| 29 | Positive Regulation Of Microtubule Polymerization                                                          | 10.157           |
| 30 | Regulation Of Rho Protein Signal Transduction                                                              | 10.037           |
| 31 | Peptidyl-Tyrosine Dephosphorylation                                                                        | 9.898            |
| 32 | Optic Nerve Development                                                                                    | 9.733            |
| 33 | Regulation Of Phosphatidylinositol Dephosphorylation                                                       | 9.733            |
| 34 | Response To Fungicide                                                                                      | 9.733            |
| 35 | Regulation Of Tumor Necrosis Factor Production                                                             | 9.733            |
| 36 | Cytoplasmic Microtubule Organization                                                                       | 9.636            |
| 37 | Response To Starvation                                                                                     | 9.417            |
| 38 | Negative Regulation Of Protein Complex Assembly                                                            | 9.256            |
| 39 | Histone H3-K9 Demethylation                                                                                | 9.256            |
| 40 | Axon Extension                                                                                             | 8.985            |
| 41 | Establishment Of Endothelial Barrier                                                                       | 8.678            |
| 42 | Negative Regulation Of Collateral Sprouting                                                                | 8.343            |
| 43 | Protein K63-Linked Deubiquitination                                                                        | 8.343            |
| 44 | Microtubule Severing                                                                                       | 8.343            |
| 45 | Plus-End-Directed Vesicle Transport Along Microtubule                                                      | 8.343            |
| 46 | Insulin Secretion Involved In Cellular Response To Glucose Stimulus                                        | 8.343            |
| 47 | Positive Regulation Of Receptor Biosynthetic Process                                                       | 8.343            |
| 48 | Negative Regulation Of Interferon-Gamma-Mediated Signaling Pathway                                         | 8.343            |
| 49 | Regulation Of Protein Export From Nucleus                                                                  | 8.343            |
| 50 | Regulation Of Circadian Sleep/Wake Cycle, Sleep                                                            | 8.343            |
| 51 | Regulation Of Cellular Amino Acid Metabolic Process                                                        | 8.343            |



|     |                                                                         |       |
|-----|-------------------------------------------------------------------------|-------|
| 52  | Autophagosome Assembly                                                  | 8.234 |
| 53  | Autophagy                                                               | 8.22  |
| 54  | Microtubule Nucleation                                                  | 7.308 |
| 55  | Platelet Formation                                                      | 7.308 |
| 56  | Neuron Projection Regeneration                                          | 7.3   |
| 57  | Negative Regulation Of B Cell Apoptotic Process                         | 7.3   |
| 58  | Regulation Of Dendritic Spine Development                               | 7.3   |
| 59  | Cellular Response To Testosterone Stimulus                              | 7.3   |
| 60  | Negative Regulation Of Type I Interferon-Mediated Signaling Pathway     | 7.3   |
| 61  | Entry Of Bacterium Into Host Cell                                       | 7.3   |
| 62  | Death-Inducing Signaling Complex Assembly                               | 7.3   |
| 63  | Protein Targeting To Mitochondrion                                      | 6.871 |
| 64  | Establishment Of Protein Localization To Membrane                       | 6.489 |
| 65  | Histone H2B Ubiquitination                                              | 6.489 |
| 66  | Regulation Of Glucose Import                                            | 6.489 |
| 67  | Dephosphorylation                                                       | 6.376 |
| 68  | Phosphatidylinositol Dephosphorylation                                  | 6.311 |
| 69  | Entrainment Of Circadian Clock By Photoperiod                           | 6.311 |
| 70  | Circadian Regulation Of Gene Expression                                 | 6.164 |
| 71  | Endosome Organization                                                   | 6.147 |
| 72  | Establishment Of Mitotic Spindle Orientation                            | 6.037 |
| 73  | Deadenylation-Dependent Decapping Of Nuclear-Transcribed Mrna           | 5.84  |
| 74  | Intraciliary Transport Involved In Cilium Assembly                      | 5.84  |
| 75  | Response To Uv-C                                                        | 5.84  |
| 76  | Histone H3-K36 Demethylation                                            | 5.84  |
| 77  | Positive Regulation Of Transcription, Dna-Templated                     | 5.8   |
| 78  | Negative Regulation Of Microtubule Depolymerization                     | 5.785 |
| 79  | Positive Regulation Of Extrinsic Apoptotic Signaling Pathway            | 5.785 |
| 80  | Protein Autophosphorylation                                             | 5.774 |
| 81  | Negative Regulation Of Neuron Differentiation                           | 5.65  |
| 82  | Regulation Of Megakaryocyte Differentiation                             | 5.562 |
| 83  | Fatty Acid Metabolic Process                                            | 5.557 |
| 84  | Protein Phosphorylation                                                 | 5.359 |
| 85  | Steroid Biosynthetic Process                                            | 5.34  |
| 86  | Microtubule Bundle Formation                                            | 5.34  |
| 87  | Cellular Response To Insulin Stimulus                                   | 5.328 |
| 88  | Cellular Response To Nutrient Levels                                    | 5.309 |
| 89  | Positive Regulation Of Autophagosome Assembly                           | 5.309 |
| 90  | Rap Protein Signal Transduction                                         | 5.309 |
| 91  | Positive Regulation Of Nuclear-Transcribed Mrna Poly(A) Tail Shortening | 5.309 |
| 92  | Cell-Cell Junction Assembly                                             | 5.309 |
| 93  | Cyclooxygenase Pathway                                                  | 5.309 |
| 94  | Gene Silencing By Mirna                                                 | 5.309 |
| 95  | Regulation Of Stem Cell Population Maintenance                          | 5.309 |
| 96  | Mitochondrial Transcription                                             | 5.309 |
| 97  | Transcription By Rna Polymerase Ii                                      | 5.302 |
| 98  | Cholesterol Metabolic Process                                           | 5.215 |
| 99  | Macroautophagy                                                          | 5.206 |
| 100 | Activation Of Protein Kinase Activity                                   | 4.977 |
| 101 | Protein Deubiquitination                                                | 4.965 |
| 102 | Regulation Of Tumor Necrosis Factor-Mediated Signaling Pathway          | 4.959 |
| 103 | Regulation Of Circadian Rhythm                                          | 4.867 |
| 104 | Histone Monoubiquitination                                              | 4.867 |
| 105 | White Fat Cell Differentiation                                          | 4.867 |
| 106 | Mrna Cleavage                                                           | 4.867 |

|     |                                                                                                  |       |
|-----|--------------------------------------------------------------------------------------------------|-------|
| 107 | Regulation Of Histone Methylation                                                                | 4.867 |
| 108 | Negative Regulation By Host Of Viral Transcription                                               | 4.867 |
| 109 | Regulation Of Protein Stability                                                                  | 4.843 |
| 110 | Neuron Projection Development                                                                    | 4.782 |
| 111 | Protein K48-Linked Deubiquitination                                                              | 4.628 |
| 112 | Regulation Of Gene Expression                                                                    | 4.591 |
| 113 | Cellular Response To Hormone Stimulus                                                            | 4.58  |
| 114 | Cellular Response To Cholesterol                                                                 | 4.492 |
| 115 | Peptidyl-Serine Phosphorylation                                                                  | 4.492 |
| 116 | Protein Neddylation                                                                              | 4.492 |
| 117 | Protein Localization To Phagophore Assembly Site                                                 | 4.492 |
| 118 | Covalent Chromatin Modification                                                                  | 4.492 |
| 119 | Wnt Signaling Pathway                                                                            | 4.479 |
| 120 | Cellular Response To Dexamethasone Stimulus                                                      | 4.479 |
| 121 | Positive Regulation Of Transcription By Rna Polymerase Ii                                        | 4.447 |
| 122 | Cellular Response To Camp                                                                        | 4.408 |
| 123 | Positive Regulation Of Protein Kinase Activity                                                   | 4.408 |
| 124 | Positive Regulation Of Neuron Differentiation                                                    | 4.346 |
| 125 | Anterograde Axonal Transport                                                                     | 4.339 |
| 126 | Positive Regulation Of Gene Expression, Epigenetic                                               | 4.339 |
| 127 | Negative Regulation Of Insulin Receptor Signaling Pathway                                        | 4.339 |
| 128 | Glucose Homeostasis                                                                              | 4.313 |
| 129 | Cell Proliferation                                                                               | 4.241 |
| 130 | Nucleobase-Containing Compound Metabolic Process                                                 | 4.207 |
| 131 | 3'-Utr-Mediated Mrna Destabilization                                                             | 4.171 |
| 132 | Positive Regulation Of Nuclear-Transcribed Mrna Catabolic Process, Deadenylation-Dependent Decay | 4.171 |
| 133 | Prostaglandin Biosynthetic Process                                                               | 4.171 |
| 134 | Protein Polyubiquitination                                                                       | 4.145 |
| 135 | Spermatid Development                                                                            | 4.134 |
| 136 | Locomotory Behavior                                                                              | 4.134 |
| 137 | Cell Death                                                                                       | 4.084 |
| 138 | Response To Nutrient Levels                                                                      | 4.084 |
| 139 | Positive Regulation Of Apoptotic Process                                                         | 4.079 |
| 140 | In Utero Embryonic Development                                                                   | 4.074 |
| 141 | Oxidation-Reduction Process                                                                      | 3.985 |
| 142 | Brain Development                                                                                | 3.967 |
| 143 | Positive Regulation Of Epithelial Cell Migration                                                 | 3.967 |
| 144 | Negative Regulation Of Extrinsic Apoptotic Signaling Pathway Via Death Domain Receptors          | 3.967 |
| 145 | Cellular Response To Glucose Stimulus                                                            | 3.959 |
| 146 | Protein Dephosphorylation                                                                        | 3.93  |
| 147 | Neuromuscular Process                                                                            | 3.893 |
| 148 | Positive Regulation Of Keratinocyte Differentiation                                              | 3.893 |
| 149 | Negative Regulation Of Neurogenesis                                                              | 3.893 |
| 150 | Megakaryocyte Development                                                                        | 3.893 |
| 151 | Chromosome Organization                                                                          | 3.893 |
| 152 | Histone Mrna Catabolic Process                                                                   | 3.893 |
| 153 | Endocytosis                                                                                      | 3.877 |
| 154 | Trna Aminoacylation For Protein Translation                                                      | 3.857 |
| 155 | Positive Regulation Of Gtpase Activity                                                           | 3.772 |
| 156 | Negative Regulation Of Transcription By Rna Polymerase Ii                                        | 3.769 |
| 157 | G2/M Transition Of Mitotic Cell Cycle                                                            | 3.743 |
| 158 | Protein Ubiquitination                                                                           | 3.72  |
| 159 | Response To Estrogen                                                                             | 3.708 |
| 160 | Regulation Of Mitotic Cell Cycle                                                                 | 3.685 |
| 161 | Phosphatidic Acid Biosynthetic Process                                                           | 3.654 |

|     |                                                               |       |
|-----|---------------------------------------------------------------|-------|
| 162 | Regulation Of Macroautophagy                                  | 3.65  |
| 163 | Vascular Endothelial Growth Factor Receptor Signaling Pathway | 3.65  |
| 164 | Stimulatory C-Type Lectin Receptor Signaling Pathway          | 3.65  |
| 165 | Alternative Mrna Splicing, Via Spliceosome                    | 3.65  |
| 166 | Signal Transduction                                           | 3.646 |
| 167 | Smoothed Signaling Pathway                                    | 3.594 |
| 168 | Protein Destabilization                                       | 3.471 |
| 169 | Intracellular Receptor Signaling Pathway                      | 3.471 |
| 170 | Cellular Response To Epidermal Growth Factor Stimulus         | 3.471 |
| 171 | Protein Localization To Plasma Membrane                       | 3.457 |
| 172 | Positive Regulation Of Histone Acetylation                    | 3.435 |
| 173 | Ras Protein Signal Transduction                               | 3.435 |
| 174 | Camera-Type Eye Morphogenesis                                 | 3.435 |
| 175 | Negative Regulation Of Transcription, Dna-Templated           | 3.429 |
| 176 | Cellular Response To Glucose Starvation                       | 3.386 |
| 177 | Transcription Initiation From Rna Polymerase Ii Promoter      | 3.336 |
| 178 | Phosphorylation                                               | 3.324 |
| 179 | Chromatin Remodeling                                          | 3.324 |
| 180 | Regulation Of Cilium Assembly                                 | 3.306 |
| 181 | Non-Motile Cilium Assembly                                    | 3.306 |
| 182 | Regulation Of Actin Cytoskeleton Reorganization               | 3.244 |
| 183 | Chromosome Segregation                                        | 3.244 |
| 184 | Apoptotic Cell Clearance                                      | 3.244 |
| 185 | Positive Regulation Of Transcription Of Notch Receptor Target | 3.244 |
| 186 | Regulation Of Neuron Apoptotic Process                        | 3.244 |
| 187 | 3'-Utr-Mediated Mrna Stabilization                            | 3.244 |
| 188 | Regulation Of Cellular Response To Heat                       | 3.229 |
| 189 | Regulation Of Synaptic Plasticity                             | 3.156 |
| 190 | Transcription, Dna-Templated                                  | 3.132 |
| 191 | Response To Toxic Substance                                   | 3.115 |
| 192 | Actin Cytoskeleton Organization                               | 3.102 |
| 193 | Regulation Of Catalytic Activity                              | 3.085 |
| 194 | Endoplasmic Reticulum Unfolded Protein Response               | 3.085 |
| 195 | Mrna Stabilization                                            | 3.074 |
| 196 | Histone H3 Deacetylation                                      | 3.074 |
| 197 | Negative Regulation Of Rho Protein Signal Transduction        | 3.074 |
| 198 | Triglyceride Biosynthetic Process                             | 3.074 |
| 199 | Protein Localization To Golgi Apparatus                       | 3.074 |
| 200 | Multicellular Organism Development                            | 3.056 |
| 201 | Mapk Cascade                                                  | 3.047 |
| 202 | Ubiquitin-Dependent Protein Catabolic Process                 | 3.021 |
| 203 | Rna Secondary Structure Unwinding                             | 3.018 |
| 204 | Androgen Receptor Signaling Pathway                           | 3.018 |
| 205 | Cellular Response To Cytokine Stimulus                        | 3.018 |
| 206 | Heart Development                                             | 2.958 |
| 207 | Positive Regulation Of Stress Fiber Assembly                  | 2.954 |
| 208 | Cell Cycle                                                    | 2.954 |
| 209 | Dna Duplex Unwinding                                          | 2.954 |
| 210 | Skeletal Muscle Tissue Development                            | 2.954 |
| 211 | Negative Regulation Of Inflammatory Response                  | 2.92  |
| 212 | Positive Regulation Of Protein Export From Nucleus            | 2.92  |
| 213 | Circadian Rhythm                                              | 2.92  |
| 214 | Negative Regulation Of Stress Fiber Assembly                  | 2.92  |
| 215 | Protein Import Into Mitochondrial Matrix                      | 2.92  |
| 216 | Neurotrophin Trk Receptor Signaling Pathway                   | 2.92  |

|     |                                                                        |       |
|-----|------------------------------------------------------------------------|-------|
| 217 | Nervous System Development                                             | 2.904 |
| 218 | Double-Strand Break Repair Via Homologous Recombination                | 2.884 |
| 219 | Insulin Receptor Signaling Pathway                                     | 2.849 |
| 220 | Regulation Of G2/M Transition Of Mitotic Cell Cycle                    | 2.849 |
| 221 | Protein Stabilization                                                  | 2.813 |
| 222 | Regulation Of Mitotic Spindle Assembly                                 | 2.781 |
| 223 | Rac Protein Signal Transduction                                        | 2.781 |
| 224 | B Cell Homeostasis                                                     | 2.781 |
| 225 | Negative Regulation Of Protein Serine/Threonine Kinase Activity        | 2.781 |
| 226 | Response To Light Stimulus                                             | 2.781 |
| 227 | Positive Regulation Of Intracellular Protein Transport                 | 2.781 |
| 228 | Negative Regulation Of Gene Expression                                 | 2.778 |
| 229 | Phosphatidylinositol-3-Phosphate Biosynthetic Process                  | 2.777 |
| 230 | Cell Division                                                          | 2.74  |
| 231 | Negative Regulation Of Canonical Wnt Signaling Pathway                 | 2.734 |
| 232 | Regulation Of Vesicle Fusion                                           | 2.722 |
| 233 | Somatic Stem Cell Population Maintenance                               | 2.722 |
| 234 | Regulation Of Transcription, Dna-Templated                             | 2.679 |
| 235 | Nucleotide-Binding Oligomerization Domain Containing Signaling Pathway | 2.655 |
| 236 | Telomere Maintenance Via Telomerase                                    | 2.655 |
| 237 | Melanosome Organization                                                | 2.655 |
| 238 | Mrna Processing                                                        | 2.633 |
| 239 | Regulation Of Lipid Metabolic Process                                  | 2.625 |
| 240 | Positive Regulation Of Smooth Muscle Cell Proliferation                | 2.62  |
| 241 | Hemopoiesis                                                            | 2.571 |
| 242 | Negative Regulation Of Catalytic Activity                              | 2.571 |
| 243 | Cell Morphogenesis                                                     | 2.567 |
| 244 | Activation Of Gtpase Activity                                          | 2.539 |
| 245 | Cellular Response To Glucocorticoid Stimulus                           | 2.539 |
| 246 | Dna Methylation                                                        | 2.539 |
| 247 | Lipid Metabolic Process                                                | 2.53  |
| 248 | Protein Autoubiquitination                                             | 2.524 |
| 249 | Small Gtpase Mediated Signal Transduction                              | 2.512 |
| 250 | Cellular Response To Drug                                              | 2.479 |
| 251 | Defense Response To Virus                                              | 2.475 |
| 252 | Ciliary Basal Body-Plasma Membrane Docking                             | 2.459 |
| 253 | Signal Transduction By Protein Phosphorylation                         | 2.436 |
| 254 | Positive Regulation Of Defense Response To Virus By Host               | 2.433 |
| 255 | Mrna Export From Nucleus                                               | 2.408 |
| 256 | Regulation Of Small Gtpase Mediated Signal Transduction                | 2.404 |
| 257 | Heart Looping                                                          | 2.394 |
| 258 | Intracellular Signal Transduction                                      | 2.36  |
| 259 | Regulation Of Transcription By Rna Polymerase Ii                       | 2.329 |
| 260 | Apoptotic Process                                                      | 2.297 |
| 261 | Double-Strand Break Repair                                             | 2.276 |
| 262 | Neuron Migration                                                       | 2.268 |
| 263 | Negative Regulation Of Protein Kinase Activity                         | 2.246 |
| 264 | Neuron Projection Morphogenesis                                        | 2.239 |
| 265 | Mitotic Cytokinesis                                                    | 2.239 |
| 266 | Regulation Of Translation                                              | 2.239 |
| 267 | Regulation Of Alternative Mrna Splicing, Via Spliceosome               | 2.239 |
| 268 | Cilium Assembly                                                        | 2.22  |
| 269 | Intracellular Protein Transport                                        | 2.204 |
| 270 | Regulation Of Cell Cycle                                               | 2.204 |
| 271 | Protein Homooligomerization                                            | 2.199 |

|     |                                                                                                   |       |
|-----|---------------------------------------------------------------------------------------------------|-------|
| 272 | Regulation Of Insulin Secretion                                                                   | 2.169 |
| 273 | Positive Regulation Of Protein Binding                                                            | 2.169 |
| 274 | Phospholipid Biosynthetic Process                                                                 | 2.163 |
| 275 | Regulation Of Transcription From Rna Polymerase Ii Promoter In Response To Hypoxia                | 2.163 |
| 276 | Pituitary Gland Development                                                                       | 2.163 |
| 277 | I-Kappab Kinase/Nf-Kappab Signaling                                                               | 2.136 |
| 278 | Peptidyl-Tyrosine Phosphorylation                                                                 | 2.132 |
| 279 | Dna Repair                                                                                        | 2.106 |
| 280 | Adipose Tissue Development                                                                        | 2.086 |
| 281 | Synaptic Transmission, Glutamatergic                                                              | 2.086 |
| 282 | Bile Acid And Bile Salt Transport                                                                 | 2.086 |
| 283 | Limb Development                                                                                  | 2.086 |
| 284 | Endocytic Recycling                                                                               | 2.086 |
| 285 | Protein Homotrimerization                                                                         | 2.086 |
| 286 | Negative Regulation Of Insulin Secretion                                                          | 2.086 |
| 287 | Golgi To Plasma Membrane Protein Transport                                                        | 2.086 |
| 288 | Regulation Of Cell Shape                                                                          | 2.08  |
| 289 | Phosphatidylinositol Phosphorylation                                                              | 2.067 |
| 290 | Protein-Containing Complex Assembly                                                               | 2.031 |
| 291 | Active Evasion Of Host Immune Response Via Regulation Of Host Antigen Processing And Presentation | 2.014 |
| 292 | Beta-Catenin-Tcf Complex Assembly                                                                 | 2.014 |
| 293 | Negative Regulation Of Type I Interferon Production                                               | 2.014 |
| 294 | Endothelial Cell Migration                                                                        | 2.014 |
| 295 | Positive Regulation Of Protein Import Into Nucleus                                                | 2.014 |
| 296 | Neuromuscular Junction Development                                                                | 2.014 |
| 297 | Glycogen Metabolic Process                                                                        | 2.014 |
| 298 | Cell Differentiation                                                                              | 1.997 |
| 299 | Notch Signaling Pathway                                                                           | 1.997 |
| 300 | Activation Of Mapk Activity                                                                       | 1.997 |
| 301 | Cellular Response To Dna Damage Stimulus                                                          | 1.986 |
| 302 | Regulation Of Gtpase Activity                                                                     | 1.983 |
| 303 | Regulation Of Mitochondrial Membrane Potential                                                    | 1.947 |
| 304 | Positive Regulation Of Tor Signaling                                                              | 1.947 |
| 305 | Positive Regulation Of Smoothed Signaling Pathway                                                 | 1.947 |
| 306 | Hippo Signaling                                                                                   | 1.947 |
| 307 | Extrinsic Apoptotic Signaling Pathway In Absence Of Ligand                                        | 1.947 |
| 308 | Rab Protein Signal Transduction                                                                   | 1.928 |
| 309 | Positive Regulation Of Gene Expression                                                            | 1.919 |
| 310 | Positive Regulation Of Glucose Import                                                             | 1.884 |
| 311 | Rna Phosphodiester Bond Hydrolysis, Exonucleolytic                                                | 1.884 |
| 312 | Dna Damage Checkpoint                                                                             | 1.884 |
| 313 | Behavioral Fear Response                                                                          | 1.884 |
| 314 | Dorsal/Ventral Pattern Formation                                                                  | 1.884 |
| 315 | Positive Regulation Of Mitotic Cell Cycle                                                         | 1.884 |
| 316 | Peptidyl-Threonine Phosphorylation                                                                | 1.876 |
| 317 | Response To Endoplasmic Reticulum Stress                                                          | 1.876 |
| 318 | Dna Recombination                                                                                 | 1.876 |
| 319 | Protein Transport                                                                                 | 1.844 |
| 320 | Positive Regulation Of Proteasomal Ubiquitin-Dependent Protein Catabolic Process                  | 1.827 |
| 321 | Lipid Homeostasis                                                                                 | 1.825 |
| 322 | Regulation Of Rna Splicing                                                                        | 1.825 |
| 323 | Mrna Splicing, Via Spliceosome                                                                    | 1.819 |
| 324 | Cellular Response To Calcium Ion                                                                  | 1.803 |
| 325 | Negative Regulation Of Cell Proliferation                                                         | 1.783 |
| 326 | Endosomal Transport                                                                               | 1.78  |

|     |                                                                                                     |       |
|-----|-----------------------------------------------------------------------------------------------------|-------|
| 327 | Fibroblast Growth Factor Receptor Signaling Pathway                                                 | 1.78  |
| 328 | Negative Regulation Of Tor Signaling                                                                | 1.77  |
| 329 | Histone H4 Acetylation                                                                              | 1.77  |
| 330 | Exonucleolytic Nuclear-Transcribed Mrna Catabolic Process Involved In Deadenylation-Dependent Decay | 1.77  |
| 331 | Positive Regulation Of Telomerase Activity                                                          | 1.718 |
| 332 | Stress-Activated Protein Kinase Signaling Cascade                                                   | 1.718 |
| 333 | Liver Regeneration                                                                                  | 1.718 |
| 334 | Multicellular Organism Growth                                                                       | 1.714 |
| 335 | Regulation Of Signal Transduction By P53 Class Mediator                                             | 1.714 |
| 336 | Sensory Perception Of Sound                                                                         | 1.681 |
| 337 | Positive Regulation Of Peptidyl-Serine Phosphorylation                                              | 1.673 |
| 338 | Rho Protein Signal Transduction                                                                     | 1.673 |
| 339 | Long-Term Memory                                                                                    | 1.669 |
| 340 | Cellular Response To Estradiol Stimulus                                                             | 1.669 |
| 341 | Post-Translational Protein Modification                                                             | 1.668 |
| 342 | Positive Regulation Of Nf-Kappab Transcription Factor Activity                                      | 1.645 |
| 343 | Sodium Ion Transport                                                                                | 1.633 |
| 344 | Response To Organic Substance                                                                       | 1.622 |
| 345 | Semaphorin-Plexin Signaling Pathway                                                                 | 1.622 |
| 346 | Histone Acetylation                                                                                 | 1.622 |
| 347 | Dendrite Morphogenesis                                                                              | 1.622 |
| 348 | Regulation Of Apoptotic Process                                                                     | 1.584 |
| 349 | Positive Regulation Of Jun Kinase Activity                                                          | 1.578 |
| 350 | Hair Follicle Development                                                                           | 1.578 |
| 351 | Cell Migration                                                                                      | 1.555 |
| 352 | Positive Regulation Of Protein Phosphorylation                                                      | 1.547 |
| 353 | Glycosaminoglycan Biosynthetic Process                                                              | 1.537 |
| 354 | Negative Regulation Of G0 To G1 Transition                                                          | 1.537 |
| 355 | Cellular Response To Leukemia Inhibitory Factor                                                     | 1.526 |
| 356 | Male Gonad Development                                                                              | 1.509 |
| 357 | Fertilization                                                                                       | 1.497 |
| 358 | Chondrocyte Differentiation                                                                         | 1.497 |
| 359 | Sodium Ion Transmembrane Transport                                                                  | 1.493 |
| 360 | Negative Regulation Of Signal Transduction                                                          | 1.477 |
| 361 | Angiogenesis                                                                                        | 1.474 |
| 362 | Positive Regulation Of Erk1 And Erk2 Cascade                                                        | 1.474 |
| 363 | Regulation Of Endocytosis                                                                           | 1.46  |
| 364 | Regulation Of Cytokinesis                                                                           | 1.46  |
| 365 | Scf-Dependent Proteasomal Ubiquitin-Dependent Protein Catabolic Process                             | 1.46  |
| 366 | Spermatogenesis                                                                                     | 1.453 |
| 367 | Transmembrane Transport                                                                             | 1.436 |
| 368 | Cytoskeleton Organization                                                                           | 1.433 |
| 369 | Positive Regulation Of B Cell Proliferation                                                         | 1.424 |
| 370 | Steroid Metabolic Process                                                                           | 1.424 |
| 371 | Negative Regulation Of Autophagy                                                                    | 1.424 |
| 372 | Positive Regulation Of Autophagy                                                                    | 1.424 |
| 373 | Negative Regulation Of Protein Kinase B Signaling                                                   | 1.424 |
| 374 | Autophagy Of Mitochondrion                                                                          | 1.424 |
| 375 | Bone Development                                                                                    | 1.39  |
| 376 | Erythrocyte Differentiation                                                                         | 1.39  |
| 377 | Actin Filament Bundle Assembly                                                                      | 1.39  |
| 378 | Rna Splicing                                                                                        | 1.374 |
| 379 | Positive Regulation Of Insulin Secretion                                                            | 1.358 |
| 380 | Phosphatidylinositol-Mediated Signaling                                                             | 1.358 |
| 381 | Viral Process                                                                                       | 1.348 |

|     |                                                                                               |       |
|-----|-----------------------------------------------------------------------------------------------|-------|
| 382 | Platelet Activation                                                                           | 1.335 |
| 383 | Histone H3 Acetylation                                                                        | 1.327 |
| 384 | Activation Of Mapkk Activity                                                                  | 1.327 |
| 385 | Rna Metabolic Process                                                                         | 1.327 |
| 386 | Anatomical Structure Development                                                              | 1.298 |
| 387 | Endosome To Lysosome Transport                                                                | 1.298 |
| 388 | Inner Ear Development                                                                         | 1.298 |
| 389 | Negative Regulation Of Neuron Death                                                           | 1.298 |
| 390 | Cell-Cell Adhesion                                                                            | 1.298 |
| 391 | Positive Regulation Of Protein Serine/Threonine Kinase Activity                               | 1.27  |
| 392 | Calcium-Dependent Cell-Cell Adhesion Via Plasma Membrane Cell Adhesion Molecules              | 1.27  |
| 393 | Response To Organic Cyclic Compound                                                           | 1.27  |
| 394 | Positive Regulation Of Dna Binding Transcription Factor Activity                              | 1.262 |
| 395 | Positive Regulation Of Cysteine-Type Endopeptidase Activity Involved In Apoptotic Process     | 1.243 |
| 396 | Inositol Phosphate Metabolic Process                                                          | 1.243 |
| 397 | Gluconeogenesis                                                                               | 1.243 |
| 398 | Negative Regulation Of Protein Ubiquitination                                                 | 1.243 |
| 399 | Regulation Of Signal Transduction                                                             | 1.243 |
| 400 | Histone Deacetylation                                                                         | 1.217 |
| 401 | Microtubule-Based Movement                                                                    | 1.197 |
| 402 | Neutrophil Degranulation                                                                      | 1.193 |
| 403 | Positive Regulation Of Fat Cell Differentiation                                               | 1.192 |
| 404 | Response To Cytokine                                                                          | 1.192 |
| 405 | Receptor-Mediated Endocytosis                                                                 | 1.18  |
| 406 | Calcium Ion Transmembrane Transport                                                           | 1.177 |
| 407 | Positive Regulation Of Nik/Nf-Kappab Signaling                                                | 1.168 |
| 408 | Learning Or Memory                                                                            | 1.168 |
| 409 | Phagocytosis                                                                                  | 1.168 |
| 410 | Positive Regulation Of Mapk Cascade                                                           | 1.147 |
| 411 | Interleukin-1-Mediated Signaling Pathway                                                      | 1.145 |
| 412 | Somitogenesis                                                                                 | 1.145 |
| 413 | Cellular Response To Uv                                                                       | 1.145 |
| 414 | T Cell Costimulation                                                                          | 1.145 |
| 415 | Spindle Assembly                                                                              | 1.145 |
| 416 | Cellular Response To Tumor Necrosis Factor                                                    | 1.138 |
| 417 | Steroid Hormone Mediated Signaling Pathway                                                    | 1.102 |
| 418 | Dna Replication                                                                               | 1.093 |
| 419 | Proteolysis                                                                                   | 1.093 |
| 420 | Cellular Response To Transforming Growth Factor Beta Stimulus                                 | 1.081 |
| 421 | Regulation Of Mapk Cascade                                                                    | 1.081 |
| 422 | Chromatin Organization                                                                        | 1.076 |
| 423 | Negative Regulation Of Phosphatase Activity                                                   | 1.062 |
| 424 | Mrna 3'-End Processing                                                                        | 1.062 |
| 425 | Cell-Cell Signaling                                                                           | 1.046 |
| 426 | Glucose Metabolic Process                                                                     | 1.043 |
| 427 | Dna Damage Response, Signal Transduction By P53 Class Mediator Resulting In Cell Cycle Arrest | 1.043 |
| 428 | Retinoid Metabolic Process                                                                    | 1.025 |
| 429 | Negative Regulation Of Epithelial Cell Proliferation                                          | 1.025 |
| 430 | Embryonic Digit Morphogenesis                                                                 | 1.007 |
| 431 | Cartilage Development                                                                         | 1.007 |

**Table S4. KEGG enrichment from RNA-seq DEGs**

|    | KEGG pathway                                        | Enrichment score |
|----|-----------------------------------------------------|------------------|
| 1  | Steroid Biosynthesis                                | 42.482           |
| 2  | Terpenoid Backbone Biosynthesis                     | 17.748           |
| 3  | Longevity Regulating Pathway                        | 12.553           |
| 4  | Renal Cell Carcinoma                                | 9.578            |
| 5  | Ampk Signaling Pathway                              | 9.31             |
| 6  | Inositol Phosphate Metabolism                       | 8.931            |
| 7  | Circadian Rhythm                                    | 8.679            |
| 8  | Parathyroid Hormone Synthesis, Secretion And Action | 7.615            |
| 9  | Phosphatidylinositol Signaling System               | 6.676            |
| 10 | Autophagy - Animal                                  | 6.306            |
| 11 | Mitophagy - Animal                                  | 6.007            |
| 12 | Hedgehog Signaling Pathway                          | 5.725            |
| 13 | Thyroid Hormone Signaling Pathway                   | 5.698            |
| 14 | Adipocytokine Signaling Pathway                     | 5.659            |
| 15 | Notch Signaling Pathway                             | 5.605            |
| 16 | Neurotrophin Signaling Pathway                      | 5.554            |
| 17 | Adherens Junction                                   | 5.423            |
| 18 | Bacterial Invasion Of Epithelial Cells              | 5.276            |
| 19 | Metabolic Pathways                                  | 5.187            |
| 20 | Glucagon Signaling Pathway                          | 5.064            |
| 21 | Insulin Resistance                                  | 4.875            |
| 22 | Viral Carcinogenesis                                | 4.774            |
| 23 | Vegf Signaling Pathway                              | 4.56             |
| 24 | Herpes Simplex Infection                            | 4.363            |
| 25 | Central Carbon Metabolism In Cancer                 | 4.139            |
| 26 | Focal Adhesion                                      | 4.056            |
| 27 | Long-Term Potentiation                              | 4.016            |
| 28 | Foxo Signaling Pathway                              | 3.952            |
| 29 | Tight Junction                                      | 3.888            |
| 30 | Estrogen Signaling Pathway                          | 3.807            |
| 31 | Mapk Signaling Pathway                              | 3.787            |
| 32 | Vasopressin-Regulated Water Reabsorption            | 3.634            |
| 33 | Leukocyte Transendothelial Migration                | 3.486            |
| 34 | Mtor Signaling Pathway                              | 3.454            |
| 35 | Oxytocin Signaling Pathway                          | 3.432            |
| 36 | Pathways In Cancer                                  | 3.408            |
| 37 | Egfr Tyrosine Kinase Inhibitor Resistance           | 3.406            |
| 38 | Camp Signaling Pathway                              | 3.338            |
| 39 | Sphingolipid Signaling Pathway                      | 3.309            |
| 40 | Proteoglycans In Cancer                             | 3.288            |
| 41 | Vascular Smooth Muscle Contraction                  | 3.227            |
| 42 | Rap1 Signaling Pathway                              | 3.208            |
| 43 | Vibrio Cholerae Infection                           | 3.198            |
| 44 | Human Cytomegalovirus Infection                     | 2.937            |
| 45 | Pathogenic Escherichia Coli Infection               | 2.908            |
| 46 | Apoptosis                                           | 2.871            |
| 47 | Insulin Signaling Pathway                           | 2.85             |
| 48 | Apelin Signaling Pathway                            | 2.85             |
| 49 | Ras Signaling Pathway                               | 2.849            |
| 50 | Human Papillomavirus Infection                      | 2.83             |
| 51 | Fluid Shear Stress And Atherosclerosis              | 2.809            |
| 52 | Transcriptional Misregulation In Cancer             | 2.804            |



|     |                                                            |       |
|-----|------------------------------------------------------------|-------|
| 53  | Prostate Cancer                                            | 2.774 |
| 54  | Glycerophospholipid Metabolism                             | 2.774 |
| 55  | Endometrial Cancer                                         | 2.757 |
| 56  | Endocrine Resistance                                       | 2.745 |
| 57  | Phospholipase D Signaling Pathway                          | 2.674 |
| 58  | Melanogenesis                                              | 2.664 |
| 59  | Breast Cancer                                              | 2.656 |
| 60  | C-Type Lectin Receptor Signaling Pathway                   | 2.587 |
| 61  | Longevity Regulating Pathway - Multiple Species            | 2.579 |
| 62  | Regulation Of Actin Cytoskeleton                           | 2.449 |
| 63  | Tnf Signaling Pathway                                      | 2.446 |
| 64  | Acute Myeloid Leukemia                                     | 2.423 |
| 65  | Butanoate Metabolism                                       | 2.402 |
| 66  | Cgmp-Pkg Signaling Pathway                                 | 2.395 |
| 67  | Epithelial Cell Signaling In Helicobacter Pylori Infection | 2.352 |
| 68  | Prolactin Signaling Pathway                                | 2.284 |
| 69  | Thermogenesis                                              | 2.278 |
| 70  | Axon Guidance                                              | 2.231 |
| 71  | Melanoma                                                   | 2.221 |
| 72  | Cell Cycle                                                 | 2.17  |
| 73  | Alcoholism                                                 | 2.169 |
| 74  | Endocytosis                                                | 2.138 |
| 75  | Chronic Myeloid Leukemia                                   | 2.104 |
| 76  | Relaxin Signaling Pathway                                  | 2.07  |
| 77  | Chemokine Signaling Pathway                                | 2.066 |
| 78  | Dopaminergic Synapse                                       | 2.054 |
| 79  | Spliceosome                                                | 2.008 |
| 80  | Epstein-Barr Virus Infection                               | 1.943 |
| 81  | Peroxisome                                                 | 1.927 |
| 82  | ErbB Signaling Pathway                                     | 1.881 |
| 83  | Adrenergic Signaling In Cardiomyocytes                     | 1.868 |
| 84  | Hepatitis B                                                | 1.868 |
| 85  | Human Immunodeficiency Virus 1 Infection                   | 1.842 |
| 86  | Gap Junction                                               | 1.817 |
| 87  | Non-Alcoholic Fatty Liver Disease (Nafld)                  | 1.806 |
| 88  | Gastric Cancer                                             | 1.806 |
| 89  | Mrna Surveillance Pathway                                  | 1.757 |
| 90  | Cushing Syndrome                                           | 1.747 |
| 91  | Hippo Signaling Pathway                                    | 1.747 |
| 92  | Micrnas In Cancer                                          | 1.745 |
| 93  | Gnrh Signaling Pathway                                     | 1.72  |
| 94  | Il-17 Signaling Pathway                                    | 1.72  |
| 95  | Glycine, Serine And Threonine Metabolism                   | 1.682 |
| 96  | Jak-Stat Signaling Pathway                                 | 1.661 |
| 97  | Bladder Cancer                                             | 1.641 |
| 98  | Nod-Like Receptor Signaling Pathway                        | 1.602 |
| 99  | Hepatocellular Carcinoma                                   | 1.602 |
| 100 | T Cell Receptor Signaling Pathway                          | 1.583 |
| 101 | Influenza A                                                | 1.573 |
| 102 | Abc Transporters                                           | 1.529 |
| 103 | Basal Transcription Factors                                | 1.495 |
| 104 | Pi3K-Akt Signaling Pathway                                 | 1.473 |
| 105 | Kaposi Sarcoma-Associated Herpesvirus Infection            | 1.447 |
| 106 | Valine, Leucine And Isoleucine Degradation                 | 1.401 |
| 107 | Amino Sugar And Nucleotide Sugar Metabolism                | 1.401 |

|     |                                           |       |
|-----|-------------------------------------------|-------|
| 108 | Huntington Disease                        | 1.394 |
| 109 | Cocaine Addiction                         | 1.373 |
| 110 | Mineral Absorption                        | 1.319 |
| 111 | Amyotrophic Lateral Sclerosis (Als)       | 1.319 |
| 112 | Platelet Activation                       | 1.3   |
| 113 | Osteoclast Differentiation                | 1.249 |
| 114 | Hepatitis C                               | 1.221 |
| 115 | Natural Killer Cell Mediated Cytotoxicity | 1.221 |
| 116 | Steroid Hormone Biosynthesis              | 1.14  |
| 117 | Lysine Degradation                        | 1.14  |
| 118 | Wnt Signaling Pathway                     | 1.095 |
| 119 | Arachidonic Acid Metabolism               | 1.068 |
| 120 | Cortisol Synthesis And Secretion          | 1.051 |
| 121 | Non-Small Cell Lung Cancer                | 1.019 |
| 122 | Aminoacyl-Trna Biosynthesis               | 1.019 |

**Table S5. GO enrichment from LC-MS/MS DEPs**

|    | Gene Ontology Term (GO term)                                            | Enrichment score |
|----|-------------------------------------------------------------------------|------------------|
| 1  | Retrograde Protein Transport, Er To Cytosol                             | 92.73            |
| 2  | Positive Regulation Of Glycoprotein Metabolic Process                   | 92.73            |
| 3  | Vesicle Transport Along Microtubule                                     | 49.92            |
| 4  | Triglyceride Mobilization                                               | 46.36            |
| 5  | Interleukin-8 Secretion                                                 | 46.36            |
| 6  | Regulation Of Protein Metabolic Process                                 | 30.91            |
| 7  | Protein C-Linked Glycosylation Via 2'-Alpha-Mannosyl-L-Tryptophan       | 26.49            |
| 8  | Growth Hormone Secretion                                                | 26.49            |
| 9  | Leukotriene Biosynthetic Process                                        | 18.55            |
| 10 | Cellular Response To Insulin Stimulus                                   | 17.45            |
| 11 | Virion Assembly                                                         | 16.86            |
| 12 | Cargo Loading Into Copii-Coated Vesicle                                 | 14.27            |
| 13 | Positive Regulation Of Ubiquitin Protein Ligase Activity                | 14.27            |
| 14 | Establishment Of Endothelial Intestinal Barrier                         | 14.27            |
| 15 | Er-Associated Misfolded Protein Catabolic Process                       | 14.27            |
| 16 | Phagocytosis                                                            | 13.98            |
| 17 | Lipoprotein Transport                                                   | 13.25            |
| 18 | Erad Pathway                                                            | 13.25            |
| 19 | Ubiquitin-Dependent Erad Pathway                                        | 10.43            |
| 20 | Regulation Of Actin Cytoskeleton Organization                           | 10.28            |
| 21 | Rab Protein Signal Transduction                                         | 9.71             |
| 22 | Error-Free Translesion Synthesis                                        | 9.27             |
| 23 | Protein Folding                                                         | 9.05             |
| 24 | Melanosome Transport                                                    | 8.43             |
| 25 | Proteasome-Mediated Ubiquitin-Dependent Protein Catabolic Process       | 8.15             |
| 26 | Intracellular Protein Transport                                         | 7.86             |
| 27 | Neutrophil Degranulation                                                | 7.73             |
| 28 | Receptor-Mediated Endocytosis                                           | 7.49             |
| 29 | Er To Golgi Vesicle-Mediated Transport                                  | 7.31             |
| 30 | Post-Translational Protein Modification                                 | 7.27             |
| 31 | Regulation Of Cell Morphogenesis                                        | 7.13             |
| 32 | Osteoblast Differentiation                                              | 6.92             |
| 33 | Regulation Of Cell Motility                                             | 6.62             |
| 34 | Response To Virus                                                       | 6.59             |
| 35 | Protein Methylation                                                     | 6.18             |
| 36 | Autophagy                                                               | 5.92             |
| 37 | Golgi Organization                                                      | 5.87             |
| 38 | Protein Deubiquitination                                                | 5.86             |
| 39 | Atp Metabolic Process                                                   | 5.8              |
| 40 | Proteasomal Protein Catabolic Process                                   | 5.45             |
| 41 | Actin Cytoskeleton Organization                                         | 4.79             |
| 42 | Substrate Adhesion-Dependent Cell Spreading                             | 4.52             |
| 43 | Response To Lipopolysaccharide                                          | 4.29             |
| 44 | Biological_Process                                                      | 4.01             |
| 45 | Translation                                                             | 3.7              |
| 46 | Autophagosome Assembly                                                  | 3.37             |
| 47 | Retinoid Metabolic Process                                              | 3.25             |
| 48 | Negative Regulation Of Neuron Projection Development                    | 3.25             |
| 49 | Cerebral Cortex Development                                             | 3.14             |
| 50 | Antimicrobial Humoral Immune Response Mediated By Antimicrobial Peptide | 3.09             |
| 51 | Copii Vesicle Coating                                                   | 2.94             |

|    |                                                    |      |
|----|----------------------------------------------------|------|
| 52 | Positive Regulation Of Protein Catabolic Process   | 2.51 |
| 53 | Response To Endoplasmic Reticulum Stress           | 2.51 |
| 54 | Lipid Catabolic Process                            | 2.23 |
| 55 | Rho Protein Signal Transduction                    | 2.23 |
| 56 | Retrograde Vesicle-Mediated Transport, Golgi To Er | 2.21 |
| 57 | Actin Filament Organization                        | 1.77 |
| 58 | Vesicle-Mediated Transport                         | 1.57 |
| 59 | Cellular Response To Tumor Necrosis Factor         | 1.52 |
| 60 | Platelet Degranulation                             | 1.5  |
| 61 | Protein Phosphorylation                            | 1.48 |
| 62 | Negative Regulation Of Neuron Apoptotic Process    | 1.43 |
| 63 | Positive Regulation Of Cell Proliferation          | 1.4  |
| 64 | Lipid Metabolic Process                            | 1.38 |
| 65 | Oxidation-Reduction Process                        | 1.27 |
| 66 | Endocytosis                                        | 1.25 |
| 67 | Aging                                              | 1.17 |
| 68 | Cytoskeleton Organization                          | 1.14 |

**Table S6. KEGG enrichment from LC-MS/MS DEPs**

|    | KEGG pathway                                | Enrichment score |
|----|---------------------------------------------|------------------|
| 1  | Protein Processing In Endoplasmic Reticulum | 7.805            |
| 2  | Legionellosis                               | 7.178            |
| 3  | Vitamin Digestion And Absorption            | 6.919            |
| 4  | Fat Digestion And Absorption                | 4.05             |
| 5  | Proteasome                                  | 3.69             |
| 6  | Ether Lipid Metabolism                      | 3.533            |
| 7  | Amino Sugar And Nucleotide Sugar Metabolism | 3.46             |
| 8  | Cholesterol Metabolism                      | 3.321            |
| 9  | Phagosome                                   | 2.597            |
| 10 | Aminoacyl-Trna Biosynthesis                 | 2.516            |
| 11 | Metabolic Pathways                          | 2.444            |
| 12 | Ppar Signaling Pathway                      | 2.244            |
| 13 | Amoebiasis                                  | 1.73             |
| 14 | Glycerophospholipid Metabolism              | 1.712            |
| 15 | Insulin Resistance                          | 1.552            |
| 16 | Vascular Smooth Muscle Contraction          | 1.372            |
| 17 | Systemic Lupus Erythematosus                | 1.249            |
| 18 | Spliceosome                                 | 1.239            |

**Table S7. List of qPCR primers**

| Species           | Gene            | Forward primer (5'-3') | Reverse primer (5'-3') |
|-------------------|-----------------|------------------------|------------------------|
| <i>D. rerio</i>   | <i>atg10l</i>   | TCAC TTTCGTGCGAGTGTCT  | CACTCGTCTGAAAAGGGCCA   |
|                   | <i>bnip4</i>    | CAGTCCCAGACGTGTCCAGA   | GATCCTTGCAACAGCTTCGG   |
|                   | <i>fabp10a</i>  | AACTCCTTCACCATCGGCAA   | ATCATGGTGGTTCCTCCGAC   |
|                   | <i>fdps</i>     | TGAGCCAGGACGAGTCCATA   | CCTCCAGGGGCATTGTACTG   |
|                   | <i>lsm12b</i>   | CGTCGTAATCTCACCACCGT   | TCCTTCTGTGTTTGCTGTGC   |
|                   | <i>lss</i>      | GGCATT TGCGTGTATGGGTC  | ATCAATCCCAGCAAAGCCCA   |
|                   | <i>map1lc3a</i> | ACCCTTCAAACAACGACGGA   | TGGAAGTTGCTTTTCCCCCT   |
|                   | <i>mvk</i>      | GAGCATTCTGTCGTGCATGG   | AAGTTCCTTGGGGTCCCTCT   |
|                   | <i>rpl13a</i>   | ATCATGGCGGACCGATTCAA   | TCTTGCGGAGGAAAGCCAAA   |
| <i>H. sapiens</i> | <i>ACTB</i>     | ACCATGGATGATGATATCGC   | CATAGGAATCCTTCTGACCCA  |
|                   | <i>FDPS</i>     | GGTAGTAGCATTCCGGGAG    | ATTGATGGCATCCAAACCCA   |
|                   | <i>HMGCR</i>    | TAGCTGGACGCAACCTTTAT   | TAGCAGCAGGTTTCTTGTC    |
|                   | <i>HMGCS</i>    | ACCGCTGCTATTCTGTCTAC   | GTCATT CAGCAACATCCGAG  |
|                   | <i>LSS</i>      | GAGCGGCGTTATTTGCAGAG   | AGACACCGGACTCCTCTCTC   |
|                   | <i>MVK</i>      | TTCCCAGGAGCCATGTTGTC   | TACAGCCAGTGCTACCTTGC   |
|                   | <i>TBP</i>      | GTTCAGCAGTCAACGTCCCA   | TCATGGGGGAGGGATACAGT   |

## Adjusted weighted average of gene expression within KEGG pathway nodes

The weighted single gene is calculated taking the relative expression level of a gene (Z:A, log<sub>2</sub>) and multiplying it by the complement of the statistical significance of the relative expression (1 - p-value). Using this method, gene with a less statistically significant difference has a higher p-value which when complemented will be closer to zero and when multiplied by the gene expression level will result in a lower magnitude weighted gene expression. A gene with more statistically significant difference has a lower p-value which when complemented will be closer to one, which will result in less changed magnitude weighted gene expression. Overall, this will decrease the perceived influence of less significant genes whereas more significant genes remain more unchanged. A weighting power is applied to increase the weighting given to the statistical significance.

$$\text{Weighted single gene} = \text{gene expression} \times (1 - \text{significance})^{\text{weight}}$$

Example (weight of 5):

| Gene         | Expression (Z:A, Log2) | Significance (Z:A, p-value) | Weighted single gene (Z:A) |
|--------------|------------------------|-----------------------------|----------------------------|
| <i>lmnb1</i> | -0.60                  | 0.27                        | -0.12                      |
| <i>lmna</i>  | -0.90                  | 0.00                        | -0.89                      |
| <i>lmnb2</i> | 0.20                   | 0.87                        | 0.00                       |

In signalling pathway networks, individual nodes often contain multiple genes that contribute to the node as each gene performs the function of the node. The one-to-many relationship of human to zebrafish orthologs exacerbates the number of genes in nodes. To apply the weighting methodology to multiple genes within a node, a weighted averaged is calculated. The weighted single gene expressions are summed and divided by the sum of the significance to calculate the weighted multiple gene.

$$\text{Weighted multiple gene} = \frac{\sum_{\text{node genes}} (\text{gene expression} \times (1 - \text{significance})^{\text{weight}})}{\sum_{\text{node genes}} ((1 - \text{significance})^{\text{weight}})}$$

One limitation of a weighted average is nodes where all genes have little significance can be misleading as the denominator remains small, so the weighting on significance is lost. This is adjusted for by multiplying the weighted multiple gene by the complement of the product of all the genes' significance - that is the overall significance of the node. Again, this significance is given a weighting power.

$$\text{Adjusted weighted multiple gene} = \frac{\sum_{\text{node genes}} (\text{gene expression} \times (1 - \text{significance})^{\text{weight}})}{\sum_{\text{node genes}} ((1 - \text{significance})^{\text{weight}})} \times (1 - \prod_{\text{node genes}} \text{significance})^{\text{weight}}$$
